# Supplementary material for: Zirconium-bearing accessory minerals in UK Paleogene granites: textural, compositional, and paragenetic relationships
Source: Copernicus journal article supplement (doi:10.5194/ejm-33-537-2021), 2021-09-23
Supplement: Supplementary file 1 [file Supplementary Table 1.xlsx]

## Sheet: Accessory Minerals
Accessory minerals excluding Zr-bearing phases in UK Palaeogene granites
√ = identified
						allanite-(Ce)/	britholite/
		chevkinite-(Ce)	aenigmatite	titanite	thorite	epidote	apatite	xenotime	monazite-(Ce)	TiO2	ilmenite	magnetite	fergusonite	fluornatropyrochlore	galena	sphalerite	chalcopyrite	pyrrhotite	pyrite	REE carbonate	barite	fluorite
Skye: Eastern Redhills Centre	Sample
Beinn na Cro Granite	H1200	√						√		√									√
Creag Strollamus Granite	H1226	√			√			√					√								√	√
Glas Bheinn Mhor Granite	GBME	√				√	√				√	√				√						√
Skye: Western Redhills Centre
Maol na Gainmich Granite	14709	√			√	√	√	√	√		√	√
(Northern) Porphyritic Felsite	NPF (sheared )#1	√			√	√	√	√				√
Loch Ainort Granite	H1554	√		√		√	√				√	√
Glamaig Granite	GLE2	√		√	√	√	√	√	√		√	√			√	√	√	√			√
Skye: Strath na Creitheach Centre
Meall Dearg Granite	MD	√					√				√							√				√
Ruadh Stac Granite	RS1	√					√				√	√			√	√						√
Rum
Western Granite	RUM	√		√		√	√				√	√			√		√
Ardnamurchan
Granophyre, Centre 2	14724	√		√		√	√		√			√					√		√		√
Grigadale Granophyre	13138	√					√	√	√		√	√			√				√		√
Mull
Beinn a'Ghraig Granophyre	13274	√		√			√				√	√
Toll Doire Granophyre	44858	√		√		√	√	√			√	√				√
Ailsa Craig
Ailsa Craig Granite	DV24828		√				√		√			√		√						√		√
Mourne Mountains
G1 cumulate	G1 cum	√				√	√				√	√				√	√
