# Supplementary material for: Zirconium-bearing accessory minerals in UK Paleogene granites: textural, compositional, and paragenetic relationships
Source: Copernicus journal article supplement (doi:10.5194/ejm-33-537-2021), 2021-09-23
Supplement: Supplementary file 2 [file Supplementary Table 2.xlsx]

## Sheet: MagZircSkye
Magmatic zircon compositions - Intrusions in Skye
	Eastern Redhills Centre														Western Redhills Centre																				Strath na Creitheach Centre
Intrusion	Creag Strollamus Granite		Beinn na Cro Granite						Glas Bheinn Mhor Granite						Northern Porphyritic Felsite				Loch Ainort Granite						Maol na Gainmich Granite				Glamaig Granite						Meall Dearg Granite
analysis	H1226_Z2	H1226_Z4	H1200_Z3	H1200_Z2b	H1200_Z4	H1200_Z5	H1200_Z6	H1200_Z2a	GBME_Z5	GBME_Z4	GBME_Z3a	GBME_Z3b	GBME_Z3c	GBME_Z1	NPFx1_Z1c	NPFx1_Z3	NPFx1_Z2a	NPFx1_Z2b	H1554_Z1c	H1554_Z2	H1554_Z1b	H1554_Z3	H1554_Z6	H1554_Z7	14709_Z2	14709_Z5	14709_Z4	14709_Z6	GLE2_Z1	GLE2_Z7a	GLE2_Z3	GLE2_Z4	GLE2_Z5	GLE2_Z6	MD_Z5	MD_Z3	MD_Z4	MD_Z6	MD_Z7
N =	4	3	3	3	3	3	3	3	6	3	3	1	1	3	3	3	2	1	1	3	3	3	3	3	3	3	3	3	3	2	3	2	2	2	2	3	2	2	3
wt.%
SiO2	32.6175	32.4033	32.4867	32.3967	32.7067	32.6	32.5067	32.4333	32.63	32.5833	32.6467	32.74	32.65	32.63	32.5	32.5333	32.315	32.35	32.53	32.3067	32.8567	32.9633	32.79	32.6267	32.6767	32.38	32.42	32.7333	32.8567	32.475	32.8633	32.765	32.585	32.675	32.51	32.4233	32.825	32.68	32.58
TiO2	bdl	bdl	0.035	bdl	bdl	bdl	0.0363333	bdl	bdl	bdl	bdl	bdl	0.072	bdl	bdl	bdl	0.033	0.054	0.026	bdl	bdl	bdl	0.0266667	bdl	bdl	bdl	bdl	bdl	0.026	bdl	bdl	0.0985	0.076	0.044	bdl	bdl	bdl	bdl	bdl
Al2O3	bdl	bdl	bdl	bdl	bdl	bdl	bdl	bdl	bdl	bdl	bdl	bdl	bdl	bdl	bdl	bdl	bdl	bdl	bdl	bdl	bdl	bdl	bdl	bdl	bdl	bdl	bdl	bdl	bdl	bdl	bdl	bdl	bdl	bdl	bdl	bdl	bdl	bdl	bdl
FeO*	0.0285	0.190333	0.293	0.120667	0.803333	0.326333	0.353667	0.0726667	0.161167	0.197	0.259333	0.408	0.83	0.393667	0.259	0.144	0.078	0.252	0.36	0.0153333	0.0873333	0.246667	0.0833333	0.0736667	0.353667	0.038	0.297	0.161667	0.25	0.212	0.051	1.033	0.406	0.554	0.12	0.108	0.7085	0.139	0.375
MgO	bdl	bdl	bdl	bdl	bdl	bdl	bdl	bdl	bdl	bdl	bdl	bdl	bdl	bdl	bdl	bdl	bdl	bdl	bdl	bdl	bdl	bdl	bdl	bdl	bdl	bdl	bdl	bdl	bdl	0.0165	bdl	bdl	bdl	bdl	bdl	bdl	bdl	bdl	0.0243333
CaO	bdl	bdl	bdl	bdl	bdl	bdl	bdl	bdl	0.0205	bdl	bdl	0.042	0.021	bdl	0.019	bdl	bdl	0.02	bdl	bdl	bdl	0.007	0.110667	bdl	bdl	0.0263333	bdl	0.017	0.018	0.0335	0.0223333	bdl	0.017	0.048	0.0335	bdl	0.023	bdl	0.0216667
ZrO2	65.5075	63.6333	64.3633	64.1367	63.66	64.0767	64.56	64.3067	65.9767	66.3933	65.8167	66.23	65.76	66.5367	65.7867	65.68	66.525	65.3	64.61	63.0833	66.11	65.9333	66.02	64.66	65.1733	64.4733	63.5767	65.7733	65.9533	64.48	65.8533	65.805	65.355	64.07	65.11	64.7267	64.395	65.375	64.4667
HfO2	1.23675	1.22	1.30333	1.31267	1.26333	1.20767	1.28667	1.34	1.13583	1.20133	1.16967	1.25	1.013	1.20667	1.09767	0.914667	0.9995	0.701	1.025	1.01467	1.13467	1.13	1.14567	1.17733	0.965333	0.830333	0.895667	1.126	1.25033	1.153	1.08467	1.112	1.02	1.138	0.918	0.896	1.17	1.089	1.16333
ThO2	0.09425	0.0836667	bdl	bdl	bdl	bdl	bdl	bdl	bdl	bdl	bdl	bdl	bdl	0.0743333	bdl	0.0616667	0.113	bdl	bdl	0.0973333	bdl	bdl	bdl	0.059	bdl	0.0553333	bdl	0.0603333	bdl	0.131	0.0646667	0.1105	0.0875	0.099	bdl	bdl	bdl	bdl	0.0796667
UO2	bdl	bdl	0.156	0.066	0.0736667	bdl	bdl	bdl	bdl	0.048	bdl	bdl	bdl	bdl	bdl	bdl	0.0635	0.079	bdl	bdl	bdl	bdl	0.092	bdl	0.0726667	bdl	bdl	bdl	bdl	bdl	bdl	0.1155	bdl	bdl	bdl	bdl	0.05	0.1405	bdl
Nb2O5	bdl	bdl	bdl	bdl	bdl	bdl	bdl	bdl	bdl	bdl	bdl	bdl	bdl	bdl	bdl	bdl	bdl	bdl	bdl	bdl	bdl	bdl	0.0763333	bdl	bdl	bdl	bdl	bdl	0.0863333	bdl	bdl	bdl	bdl	bdl	bdl	bdl	bdl	bdl	bdl
P2O5	0.12025	0.164667	0.177333	0.216333	0.164333	0.203	0.158333	0.242	0.123833	0.143	0.118	0.164	0.134	0.101	0.161667	0.175667	0.1165	0.153	0.156	0.226667	0.105	0.120333	0.218	0.221	0.105667	0.222	0.123	0.0873333	0.111667	0.2955	0.139333	0.112	0.101	0.1625	0.14	0.217333	0.143	0.116	0.101333
Y2O3	0.29275	0.654	0.847333	0.754667	0.510333	0.616	0.556667	0.714	0.211667	0.153667	0.261667	0.21	0.15	0.250667	0.571333	0.716667	0.1965	0.703	0.73	1.43333	0.202667	0.318	0.258667	1.09467	0.634667	0.919	0.843667	0.198	0.103333	0.656	0.236	0.3255	0.1395	0.6765	0.5255	0.679	0.808	0.558	0.879333
La2O3	bdl	bdl	bdl	bdl	bdl	bdl	bdl	bdl	bdl	bdl	bdl	bdl	bdl	bdl	bdl	bdl	bdl	0.212	bdl	bdl	bdl	bdl	bdl	bdl	bdl	bdl	bdl	bdl	bdl	bdl	bdl	bdl	bdl	bdl	bdl	bdl	bdl	bdl	bdl
Ce2O3	bdl	bdl	bdl	0.105667	bdl	bdl	bdl	bdl	bdl	bdl	0.111667	bdl	0.159	bdl	0.102667	bdl	bdl	0.1	bdl	bdl	bdl	0.097	bdl	bdl	bdl	bdl	0.105	bdl	bdl	0.166	bdl	bdl	bdl	bdl	bdl	bdl	bdl	bdl	bdl
Pr2O3	bdl	0.139333	bdl	bdl	bdl	bdl	bdl	bdl	bdl	bdl	0.117	bdl	0.13	bdl	bdl	bdl	0.1405	bdl	bdl	0.104	bdl	bdl	bdl	bdl	0.111667	bdl	bdl	bdl	bdl	0.098	bdl	0.109	bdl	bdl	bdl	bdl	bdl	bdl	0.0593333
Nd2O3	bdl	bdl	0.107667	bdl	bdl	bdl	bdl	bdl	bdl	bdl	0.143333	bdl	bdl	bdl	bdl	bdl	bdl	bdl	0.12	bdl	bdl	bdl	bdl	bdl	bdl	bdl	bdl	0.131333	bdl	bdl	0.156333	bdl	bdl	bdl	bdl	bdl	bdl	bdl	bdl
Sm2O3	bdl	bdl	bdl	bdl	bdl	bdl	bdl	bdl	bdl	bdl	bdl	0.32	0.116	bdl	bdl	0.132	bdl	0.212	bdl	bdl	bdl	0.189333	bdl	bdl	bdl	bdl	bdl	0.117	bdl	bdl	bdl	bdl	bdl	bdl	0.1195	bdl	bdl	0.133	bdl
Eu2O3	bdl	bdl	bdl	bdl	bdl	bdl	bdl	bdl	bdl	bdl	bdl	bdl	bdl	bdl	bdl	bdl	bdl	bdl	bdl	bdl	bdl	bdl	bdl	bdl	bdl	bdl	bdl	bdl	bdl	bdl	bdl	bdl	bdl	bdl	bdl	bdl	bdl	bdl	bdl
Gd2O3	bdl	0.122	bdl	bdl	bdl	bdl	bdl	bdl	bdl	bdl	bdl	0.165	bdl	bdl	0.146	0.194667	bdl	bdl	bdl	bdl	bdl	bdl	0.189	bdl	bdl	bdl	bdl	bdl	bdl	0.116	bdl	bdl	bdl	bdl	bdl	bdl	bdl	bdl	bdl
Dy2O3	bdl	bdl	bdl	0.219333	bdl	bdl	bdl	0.150667	bdl	bdl	bdl	0.2	bdl	bdl	bdl	bdl	bdl	bdl	bdl	bdl	bdl	bdl	bdl	bdl	bdl	0.146	0.183667	bdl	0.176	bdl	bdl	bdl	bdl	bdl	bdl	bdl	bdl	bdl	bdl
Er2O3	bdl	bdl	0.149	0.195	0.117667	bdl	0.114667	0.0973333	bdl	bdl	bdl	bdl	0.12	bdl	bdl	bdl	bdl	0.1	bdl	0.247333	bdl	bdl	bdl	0.205667	bdl	bdl	bdl	bdl	bdl	0.184	bdl	bdl	bdl	0.153	bdl	bdl	0.1465	0.1	bdl
Yb2O3	bdl	0.104	0.209	0.15	bdl	0.11	0.117	bdl	bdl	bdl	0.135	bdl	bdl	bdl	bdl	bdl	bdl	0.164	0.178	0.219667	bdl	bdl	bdl	0.246333	0.121	0.153667	0.172	bdl	bdl	0.199	bdl	bdl	bdl	0.1665	0.125	0.170333	0.1225	0.101	0.217667
Total	`	98.7147	100.128	99.6737	99.2993	99.1397	99.69	99.3567	100.26	100.72	100.779	101.729	101.155	101.193	100.644	100.553	100.581	100.4	99.735	98.7483	100.496	101.005	101.01	100.364	100.215	99.244	98.6167	100.405	100.832	100.216	100.471	101.586	99.787	99.7865	99.6015	99.2207	100.391	100.431	99.9683
Zr/Hf w/w	46.2421	45.5358	43.1133	42.656	43.9923	46.3213	43.8052	41.8966	50.7112	48.2491	49.1249	46.2565	56.6735	48.1395	52.3233	62.69	58.1072	81.3248	55.0306	54.2774	50.8659	50.9395	50.3089	47.9473	58.9414	67.7884	61.9697	50.9964	46.051	48.8229	53.0041	51.6633	55.938	49.1519	61.9203	63.0672	48.0501	52.4097	48.3792
formulae on the basis of 16 oxygens
Si	4.00123	4.0233	3.99151	3.99764	4.03168	4.02221	3.99968	4.00194	3.98763	3.97142	3.98198	3.96522	3.97097	3.96485	3.96889	3.97494	3.95154	3.96439	4.00184	4.01554	4.00331	4.00105	3.97996	3.99319	4.0012	3.99742	4.02684	3.99774	3.99536	3.98517	4.00515	3.96933	3.99887	4.01598	3.99839	3.9998	4.01271	3.99667	4.00373
Ti	--	--	0.00323533	--	--	--	0.00336339	--	--	--	--	--	0.00658817	--	--	--	0.00303595	0.00497868	0.0024064	--	--	--	0.00243515	--	--	--	--	--	0.00237862	--	--	0.00897763	0.00701701	0.00406862	--	--	--	--	--
Al	--	--	--	--	--	--	--	--	--	--	--	--	--	--	--	--	--	--	--	--	--	--	--	--	--	--	--	--	--	--	--	--	--	--	--	--	--	--	--
Fe2+	0.00292391	0.0197644	0.0301075	0.0124528	0.0828174	0.0336732	0.0363934	0.00749877	0.0164721	0.0200813	0.0264541	0.0413261	0.0844243	0.0400049	0.0264522	0.0147143	0.00797686	0.0258272	0.0370385	0.00159391	0.0088992	0.0250397	0.00845925	0.00754038	0.0362178	0.0039234	0.030852	0.0165128	0.0254243	0.0217575	0.0051982	0.10466	0.0416698	0.0569458	0.0123431	0.0111424	0.072435	0.0142169	0.0385408
Mg	--	--	--	--	--	--	--	--	--	--	--	--	--	--	--	--	--	--	--	--	--	--	--	--	--	--	--	--	--	0.00301836	--	--	--	--	--	--	--	--	0.00445764
Ca	--	--	--	--	--	--	--	--	0.00268439	--	--	0.00545045	0.0027367	--	0.00248619	--	--	0.00262619	--	--	--	0.000910406	0.0143929	--	--	0.0034834	--	0.00222468	0.00234531	0.00440491	0.00291645	--	0.00223544	0.00632138	0.00441476	--	0.0030127	--	0.00285299
Zr	3.91882	3.85299	3.85648	3.8595	3.82682	3.85539	3.8738	3.86951	3.93196	3.94636	3.91487	3.91169	3.90029	3.94268	3.91782	3.91341	3.96705	3.90244	3.87612	3.82374	3.92811	3.90274	3.90782	3.85926	3.89174	3.88154	3.85097	3.91738	3.91102	3.85872	3.91387	3.88765	3.91129	3.84018	3.90514	3.8939	3.8389	3.89896	3.86341
Hf	0.0433087	0.0432417	0.0457127	0.046239	0.0444548	0.0425348	0.0451928	0.0471992	0.0396244	0.0417988	0.040726	0.0432164	0.0351701	0.0418549	0.0382654	0.0319018	0.0348895	0.0245228	0.0359956	0.0360019	0.0394652	0.0391536	0.0396959	0.0411336	0.0337427	0.0292621	0.0317576	0.0392567	0.0434019	0.0403903	0.0377358	0.0384558	0.0357331	0.0399272	0.03223	0.0315529	0.040829	0.0380184	0.0408102
Th	0.00263162	0.00236452	--	--	--	--	--	--	--	--	--	--	--	0.00205585	--	0.00171495	0.00314513	--	--	0.00275367	--	--	--	0.0016436	--	0.00155485	--	0.00167718	--	0.00365904	0.00179385	0.00304697	0.00244414	0.00276955	--	--	--	--	0.00222838
U	--	--	0.00426574	0.00181253	0.00202097	--	--	--	--	0.00130206	--	--	--	--	--	--	0.00172812	0.0021546	--	--	--	--	0.00248522	--	0.00198028	--	--	--	--	--	--	0.00311406	--	--	--	--	0.00136032	0.00382411	--
Nb	--	--	--	--	--	--	--	--	--	--	--	--	--	--	--	--	--	--	--	--	--	--	0.00419739	--	--	--	--	--	0.00475597	--	--	--	--	--	--	--	--	--	--
P	0.0124898	0.0173111	0.018448	0.0226024	0.0171515	0.0212066	0.016495	0.0252826	0.0128134	0.0147575	0.0121862	0.0168174	0.013799	0.010391	0.0167161	0.0181727	0.0120619	0.0158752	0.016249	0.0238543	0.0108321	0.0123668	0.0224038	0.0229016	0.0109551	0.0232051	0.0129355	0.00903093	0.011497	0.0307031	0.0143777	0.0114882	0.0104947	0.0169105	0.0145789	0.0227005	0.0148012	0.0120116	0.0105437
Y	0.0190931	0.0431723	0.0553505	0.0495101	0.0334456	0.0404076	0.0364153	0.0468396	0.0137526	0.00995785	0.0169685	0.0135221	0.0096993	0.0161935	0.0370946	0.0465537	0.012775	0.0458028	0.0477457	0.0947185	0.0131284	0.0205213	0.0166922	0.0712302	0.0413175	0.060319	0.0557132	0.0128566	0.00668049	0.0427993	0.0152917	0.0209649	0.00910185	0.0442058	0.0343618	0.0445334	0.0525146	0.0362815	0.0574517
La	--	--	--	--	--	--	--	--	--	--	--	--	--	--	--	--	--	0.00957379	--	--	--	--	--	--	--	--	--	--	--	--	--	--	--	--	--	--	--	--	--
Ce	--	--	--	0.0047698	--	--	--	--	--	--	0.00498245	--	0.00707408	--	0.00458643	--	--	0.00448292	--	--	--	0.00430699	--	--	--	--	0.0047709	--	--	0.00745186	--	--	--	--	--	--	--	--	--
Pr	--	0.00629788	--	--	--	--	--	--	--	--	0.00519509	--	0.00575578	--	--	--	0.00625439	--	--	0.00470579	--	--	--	--	0.00497764	--	--	--	--	0.00437795	--	0.00480707	--	--	--	--	--	--	0.00265436
Nd	--	--	0.00472122	--	--	--	--	--	--	--	0.00623949	--	--	--	--	--	--	--	0.00526864	--	--	--	--	--	--	--	--	0.00572455	--	--	0.00679987	--	--	--	--	--	--	--	--
Sm	--	--	--	--	--	--	--	--	--	--	--	0.0133401	0.00485616	--	--	0.00555133	--	0.00894249	--	--	--	0.00791027	--	--	--	--	--	0.00491849	--	--	--	--	--	--	0.00505891	--	--	0.00559872	--
Eu	--	--	--	--	--	--	--	--	--	--	--	--	--	--	--	--	--	--	--	--	--	--	--	--	--	--	--	--	--	--	--	--	--	--	--	--	--	--	--
Gd	--	0.00501559	--	--	--	--	--	--	--	--	--	0.00661671	--	--	0.00590349	0.00787523	--	--	--	--	--	--	0.00759573	--	--	--	--	--	--	0.00471331	--	--	--	--	--	--	--	--	--
Dy	--	--	--	0.00871158	--	--	--	0.00598391	--	--	--	0.00779664	--	--	--	--	--	--	--	--	--	--	--	--	--	0.00580156	0.00734295	--	0.00688865	--	--	--	--	--	--	--	--	--	--
Er	--	--	0.00574474	0.00755076	0.00455152	--	0.00442734	0.00376872	--	--	--	--	0.00457981	--	--	--	--	0.00384551	--	0.00964689	--	--	--	0.00789884	--	--	--	--	--	0.00708546	--	--	--	0.00590093	--	--	0.00561984	0.00383768	--
Yb	--	0.00393484	0.00782491	0.00564022	--	0.00413563	0.00438673	--	--	--	0.00501759	--	--	--	--	--	--	0.00612416	0.00667264	0.00831989	--	--	--	0.00918695	0.00451481	0.00578075	0.00651001	--	--	0.00744136	--	--	--	0.0062358	0.00468467	0.00640298	0.00456321	0.0037639	0.00815094
Σcations	8.0005	8.01739	8.0234	8.01643	8.04295	8.01956	8.02016	8.00803	8.00494	8.00568	8.01461	8.02499	8.04595	8.01802	8.01822	8.01484	8.00045	8.02158	8.02933	8.02087	8.00374	8.014	8.00614	8.01398	8.02665	8.01229	8.0277	8.00733	8.00976	8.0217	8.00313	8.05249	8.01886	8.03945	8.0112	8.01004	8.04674	8.01318	8.03483
FeO* = total iron as Fe2+; bdl = below detection limit; N = number of analyses averaged; PbO, SrO = bdl

## Sheet: MagZircOtherIntrusions
Magmatic zircon compositions from other intrusions
	Rum				Ardnamurchan											Mull										Mourne Mountains
Intrusion	Western Granite				Granophyre, Centre 2							Grigadale Granophyre				Beinn a’Ghraig Granophyre					Toll Doire Granophyre					G1 cumulate
analysis	RUM_Z20b	RUM_Z5a	RUM_20a	RUM_5c	14724_Z2a	14724_Z2b	14724_Z2c	14724_Z2d	14724_Z4	14724_Z1	14724_Z3	13138_ZB	13138_ZB2	13138_Z1a	13138_ZB1	13274_Z3	13274_Z1	13274_Z2rim	13274_Z2core	13274_Z4	44858_Z5	44858_Z1a	44858_Z1b	44858_Z2	44858_Z4	G1cum_Z3	G1cum_Z2	G1cum_Z5	G1cum_Z4	G1cum_Z1a	G1cum_Z1b
N =	2	1	2	1	2	2	2	2	2	3	1	3	3	2	2	3	3	2	2	3	3	3	3	3	3	3	3	3	3	3	1
wt.%
SiO2	32.665	32.7	32.58	32.62	32.16	32.325	32.58	32.495	32.48	32.2367	32.33	32.78	32.1133	32.52	32.24	32.5367	32.51	32.325	32.485	32.42	32.86	32.1167	32.1567	32.61	32.66	32.6	32.0967	32.46	32.7767	32.6433	32.53
TiO2	bdl	0.04	bdl	bdl	0.033	bdl	bdl	0.068	0.0275	0.0393333	bdl	0.0933333	0.253667	bdl	0.031	bdl	bdl	bdl	bdl	bdl	bdl	bdl	0.0323333	bdl	bdl	bdl	bdl	bdl	0.0593333	0.0686667	0.085
Al2O3	bdl	bdl	bdl	bdl	bdl	bdl	bdl	bdl	bdl	bdl	0.072	bdl	bdl	bdl	bdl	bdl	bdl	bdl	bdl	bdl	bdl	bdl	bdl	bdl	bdl	bdl	bdl	bdl	bdl	bdl	bdl
FeO*	0.8	0.832	0.8945	0.554	0.295	1.029	0.726	0.354	0.032	0.309667	bdl	0.236	0.122333	0.0325	0.8225	0.0236667	0.157	0.657	0.1145	0.0813333	0.232333	0.521	0.296333	0.173	0.106333	0.393	0.125333	0.531	0.417667	0.488	0.896
MgO	bdl	bdl	bdl	bdl	bdl	bdl	bdl	bdl	bdl	bdl	bdl	bdl	bdl	bdl	bdl	bdl	bdl	bdl	bdl	bdl	bdl	bdl	bdl	bdl	bdl	bdl	bdl	bdl	bdl	bdl	bdl
CaO	0.033	bdl	0.0235	0.021	bdl	bdl	bdl	0.068	bdl	0.019	bdl	0.0156667	0.037	bdl	0.0375	bdl	0.033	bdl	bdl	bdl	bdl	bdl	bdl	0.0293333	bdl	bdl	0.0276667	0.0306667	bdl	bdl	0.025
ZrO2	64.305	63.24	64.255	64.49	64.675	64.825	64.68	65.45	63.385	65.11	64.17	65.0733	65.1267	64.515	63.665	65.56	65.1933	65.905	65.63	66.1333	65.3133	64.6767	64.3067	65.15	65.1767	65.3633	62.8867	65.3333	65.6433	64.9767	64.57
HfO2	1.179	0.766	1.0955	1.103	1.0335	0.903	1.0985	1.058	0.954	0.869	1.07	1.11033	1.02733	1.1745	1.325	1.08833	1.18333	1.365	1.051	1.09633	1.01633	0.997333	0.982333	0.901667	1.05033	1.20233	1.29	1.32	1.247	1.10267	1.31
ThO2	0.061	0.293	0.101	bdl	bdl	bdl	0.06	0.088	0.091	bdl	bdl	bdl	bdl	0.1135	0.247	bdl	bdl	bdl	0.0925	bdl	bdl	0.139	0.190333	bdl	bdl	0.059	0.419	bdl	bdl	bdl	bdl
UO2	bdl	bdl	0.087	bdl	0.0565	bdl	bdl	bdl	0.1675	bdl	bdl	0.088	bdl	0.255	0.1095	0.0936667	0.153333	0.081	0.1315	0.0953333	0.103667	0.145667	0.185667	0.0613333	0.0586667	0.0853333	0.696333	0.100333	0.084	0.093	0.161
Nb2O5	bdl	bdl	bdl	bdl	bdl	bdl	bdl	bdl	bdl	bdl	bdl	bdl	0.166	bdl	bdl	bdl	bdl	0.107	bdl	bdl	bdl	bdl	bdl	bdl	bdl	bdl	bdl	bdl	bdl	bdl	bdl
P2O5	0.111	0.363	0.1005	0.206	0.179	0.1625	0.094	0.129	0.2365	0.15	0.181	0.059	0.161667	0.1405	0.2745	0.191667	0.182333	0.167	0.1675	0.0976667	0.193667	0.150667	0.184	0.192667	0.154667	0.175	0.360667	0.141	0.0843333	0.0856667	0.156
Y2O3	0.3395	0.87	0.353	0.984	0.5175	0.407	0.3595	0.4285	1.25	0.375333	0.916	0.112333	0.302667	0.626	0.5705	0.266	0.357667	0.3415	0.6955	0.306	0.424	0.543667	0.596333	0.461667	0.425333	0.357667	1.04533	0.392667	0.0756667	0.0953333	0.19
La2O3	bdl	bdl	bdl	bdl	bdl	bdl	bdl	bdl	bdl	bdl	bdl	bdl	bdl	bdl	bdl	0.126667	bdl	0.1745	bdl	bdl	bdl	bdl	bdl	bdl	0.107333	bdl	0.138333	bdl	bdl	bdl	bdl
Ce2O3	bdl	0.095	bdl	bdl	bdl	bdl	bdl	bdl	bdl	bdl	bdl	0.1	bdl	bdl	0.1565	0.102667	bdl	bdl	bdl	bdl	bdl	bdl	bdl	bdl	0.152667	bdl	bdl	bdl	bdl	bdl	bdl
Pr2O3	bdl	0.11	bdl	bdl	bdl	bdl	bdl	bdl	bdl	bdl	0.101	bdl	bdl	bdl	bdl	bdl	0.150667	bdl	bdl	bdl	0.112667	bdl	bdl	bdl	bdl	bdl	bdl	bdl	0.115	bdl	bdl
Nd2O3	bdl	0.13	bdl	bdl	bdl	bdl	bdl	bdl	bdl	bdl	0.24	bdl	bdl	bdl	bdl	bdl	bdl	bdl	bdl	bdl	bdl	bdl	bdl	bdl	bdl	bdl	bdl	bdl	0.126	bdl	bdl
Sm2O3	bdl	bdl	0.1285	bdl	bdl	bdl	bdl	bdl	bdl	bdl	bdl	bdl	bdl	bdl	bdl	bdl	bdl	bdl	0.2665	0.117	bdl	bdl	bdl	bdl	bdl	bdl	bdl	bdl	bdl	bdl	bdl
Eu2O3	bdl	bdl	bdl	bdl	bdl	bdl	bdl	bdl	bdl	bdl	bdl	bdl	bdl	bdl	bdl	bdl	bdl	bdl	bdl	bdl	bdl	bdl	bdl	bdl	bdl	bdl	bdl	bdl	bdl	bdl	bdl
Gd2O3	bdl	bdl	bdl	bdl	bdl	bdl	bdl	bdl	0.178	bdl	bdl	bdl	bdl	bdl	bdl	bdl	bdl	bdl	0.188	bdl	bdl	bdl	bdl	bdl	bdl	bdl	bdl	bdl	bdl	bdl	bdl
Dy2O3	bdl	0.422	0.252	bdl	bdl	bdl	bdl	bdl	bdl	0.157	0.201	bdl	bdl	bdl	bdl	bdl	bdl	bdl	0.171	bdl	bdl	0.222333	bdl	bdl	bdl	bdl	bdl	bdl	bdl	0.181333	bdl
Er2O3	bdl	0.299	0.137	0.174	0.1385	0.153	0.12	0.098	0.2515	bdl	0.11	bdl	0.157667	0.1065	0.106	bdl	0.114333	bdl	0.176	bdl	0.107333	0.143667	0.139	bdl	bdl	bdl	0.170667	bdl	bdl	bdl	bdl
Yb2O3	bdl	0.23	bdl	0.095	0.1015	bdl	0.178	bdl	0.2545	bdl	0.217	bdl	bdl	0.298	0.103	bdl	bdl	bdl	0.09	bdl	bdl	bdl	0.143667	0.132667	bdl	0.116	0.253667	bdl	bdl	bdl	bdl
Total	99.4935	100.39	100.007	100.247	99.1895	99.8045	99.896	100.237	99.3075	99.266	99.608	99.668	99.4683	99.7815	99.688	99.9893	100.035	101.123	101.259	100.347	100.363	99.6567	99.2133	99.7123	99.892	100.352	99.5103	100.309	100.629	99.7347	99.923
Zr/Hf w/w	47.6167	72.0761	51.2062	51.044	54.6329	62.6733	51.4041	54.0072	58.0051	65.4118	52.3572	51.1656	55.3446	47.9552	41.9482	52.5902	48.0977	42.1516	54.5165	52.663	56.104	56.6155	57.1512	63.0807	54.1743	47.461	42.5595	43.2105	45.9571	51.4448	43.0316
formulae on the basis of 16 oxygens
Si	4.01973	4.00791	4.00659	3.9941	3.98074	3.97868	4.00357	3.97956	4.01819	3.98109	3.99031	4.02214	3.95942	4.00754	3.98127	3.98958	3.99039	3.9422	3.96271	3.97022	4.00812	3.96999	3.98371	4.00221	4.00561	3.98694	3.98723	3.97725	3.99676	4.01051	3.99473
Ti	--	0.00368849	--	--	0.00307312	--	--	0.00626536	0.00255956	0.00365453	--	0.00861596	0.0235303	--	0.0028801	--	--	--	--	--	--	--	0.0030136	--	--	--	--	--	0.00544327	0.00634702	0.00785309
Al	--	--	--	--	--	--	--	--	--	--	0.0104641	--	--	--	--	--	--	--	--	--	--	--	--	--	--	--	--	--	--	--	--
Fe2+	0.0823341	0.0852843	0.0919982	0.0567309	0.0305383	0.105923	0.074612	0.0362574	0.00331085	0.0319832	--	0.0242179	0.0126144	0.00334955	0.0849451	0.00242698	0.0161166	0.0670102	0.0116813	0.00833002	0.0237007	0.0538607	0.0307024	0.017757	0.0109068	0.0401966	0.0130213	0.0544132	0.042594	0.0501419	0.0920209
Mg	--	--	--	--	--	--	--	--	--	--	--	--	--	--	--	--	--	--	--	--	--	--	--	--	--	--	--	--	--	--	--
Ca	0.00435133	--	0.0030966	0.00275517	--	--	--	0.00892322	--	0.0025142	--	0.00205977	0.00488812	--	0.00496195	--	0.00434017	--	--	--	--	--	--	0.00385749	--	--	0.00368267	0.0040262	--	--	0.00328956
Zr	3.85905	3.77993	3.85347	3.85077	3.90396	3.89103	3.87603	3.90885	3.82403	3.92121	3.86237	3.89379	3.91585	3.87712	3.83397	3.92025	3.90232	3.91958	3.90421	3.94951	3.88505	3.89877	3.88503	3.89928	3.89821	3.89831	3.8097	3.90382	3.9035	3.893	3.86683
Hf	0.041417	0.0268009	0.038458	0.0385532	0.0365181	0.0317277	0.0385342	0.0369874	0.0336909	0.0306353	0.0376994	0.0388913	0.0361582	0.0413172	0.0467082	0.0380948	0.0414625	0.0475207	0.0365984	0.0383261	0.0353883	0.0351924	0.0347397	0.0315897	0.0367731	0.0419756	0.0457458	0.0461698	0.043407	0.0386723	0.0459224
Th	0.00170861	0.00817403	0.00282711	--	--	--	0.00167821	0.00245301	0.00256244	--	--	--	--	0.00318363	0.0069426	--	--	--	0.00256832	--	--	0.00391085	0.00536698	--	--	0.00164237	0.0118474	--	--	--	--
U	--	--	0.00238112	--	0.00155645	--	--	--	0.00461177	--	--	0.00240309	--	0.00699369	0.0030094	0.0025561	0.00418865	0.00219849	0.00357005	0.00259827	0.00281418	0.00400735	0.00511905	0.00167527	0.00160134	0.00232262	0.0192516	0.00273601	0.00227961	0.00254289	0.00440015
Nb	--	--	--	--	--	--	--	--	--	--	--	--	0.00927218	--	--	--	--	0.00591169	--	--	--	--	--	--	--	--	--	--	--	--	--
P	0.0115655	0.0376708	0.0104645	0.0213565	0.0187598	0.0169349	0.00978029	0.0133763	0.0247727	0.0156845	0.018915	0.00612954	0.0168769	0.0146599	0.028701	0.0198989	0.0189493	0.0172442	0.0173002	0.0101269	0.0200012	0.015769	0.0193002	0.0200209	0.0160611	0.0181212	0.0379354	0.0146279	0.00870702	0.00891138	0.0162202
Y	0.0222121	0.0566924	0.0230799	0.0640568	0.034056	0.0266336	0.0234872	0.0279	0.0822166	0.0246436	0.0601079	0.00732812	0.0198402	0.0410145	0.0374557	0.0173409	0.0233406	0.0221425	0.0451068	0.0199232	0.0274963	0.0357295	0.0392773	0.030124	0.0277343	0.023256	0.0690402	0.0255796	0.0049055	0.0062271	0.0124049
La	--	--	--	--	--	--	--	--	--	--	--	--	--	--	--	0.00572352	--	0.00784228	--	--	--	--	--	--	0.00485103	--	0.00633264	--	--	--	--
Ce	--	0.00425945	--	--	--	--	--	--	--	--	--	0.00448857	--	--	0.00706969	0.00460514	--	--	--	--	--	--	--	--	0.00684945	--	--	--	--	--	--
Pr	--	0.00490806	--	--	--	--	--	--	--	--	0.00453805	--	--	--	--	--	0.00673229	--	--	--	0.00500283	--	--	--	--	--	--	--	0.00510491	--	--
Nd	--	0.00568664	--	--	--	--	--	--	--	--	0.0105719	--	--	--	--	--	--	--	--	--	--	--	--	--	--	--	--	--	0.00548347	--	--
Sm	--	--	0.00543936	--	--	--	--	--	--	--	--	--	--	--	--	--	--	--	0.01119	0.00493184	--	--	--	--	--	--	--	--	--	--	--
Eu	--	--	--	--	--	--	--	--	--	--	--	--	--	--	--	--	--	--	--	--	--	--	--	--	--	--	--	--	--	--	--
Gd	--	--	--	--	--	--	--	--	0.00729129	--	--	--	--	--	--	--	--	--	0.00759342	--	--	--	--	--	--	--	--	--	--	--	--
Dy	--	0.0166484	0.009975	--	--	--	--	--	--	0.0062408	0.0079852	--	--	--	--	--	--	--	0.00671421	--	--	0.0088461	--	--	--	--	--	--	--	0.00717087	--
Er	--	0.0114999	0.00528685	0.00668554	0.0053796	0.00590942	0.00462733	0.00376615	0.00976349	--	0.00426036	--	0.00610012	0.00411842	0.00410757	--	0.00440377	--	0.00673713	--	0.00410829	0.00557272	0.00540361	--	--	--	0.00665293	--	--	--	--
Yb	--	0.00859013	--	0.00354454	0.00382838	--	0.00666527	--	0.00959408	--	0.00816135	--	--	0.0111904	0.00387584	--	--	--	0.00334544	--	--	--	0.00542343	0.00496149	--	0.00432296	0.00960233	--	--	--	--
Σcations	8.04237	8.05774	8.05306	8.03855	8.0184	8.05684	8.03899	8.02434	8.0226	8.01766	8.01538	8.01007	8.00454	8.01049	8.0459	8.00048	8.01225	8.03165	8.01933	8.00397	8.01168	8.03164	8.01708	8.01147	8.0086	8.01709	8.02005	8.02862	8.01819	8.02352	8.04367
FeO* = total iron as Fe2+; bdl = below detection limit; N = number of analyses averaged; PbO, SrO = bdl

## Sheet: LateStageMagZirc
Late-stage magmatic zircon compositions
	Skye
	East. Redhills	Western Redhills Centre			Strath Creith.	Mull
Intrusion	Beinn Cro	N.Porph. Fels.	Glamaig Granite		Meall Dearg	Toll Doire
analysis	H1200_Z1	H1554_Z1a	GLE2_Z8	GLE2_Z9	MD_Z1	44858_Z3
N =	4	2	3	2	3	4
wt.%
SiO2	32.54	32.865	32.7233	32.8	32.7833	32.5625
TiO2	0.12825	0.034	bdl	bdl	bdl	bdl
Al2O3	bdl	bdl	bdl	bdl	0.027	bdl
FeO*	0.73175	0.372	0.101	0.3165	0.681333	0.0555
MgO	bdl	bdl	bdl	bdl	bdl	bdl
CaO	0.01675	0.0225	bdl	0.022	0.0583333	0.0195
ZrO2	65.1775	66.015	65.1767	64.595	65.2333	65.035		`
HfO2	1.33375	1.123	1.27833	1.084	0.987	1.19575
ThO2	bdl	bdl	bdl	bdl	bdl	0.0835
UO2	bdl	bdl	bdl	0.123	bdl	0.07675
Nb2O5	bdl	bdl	bdl	bdl	bdl	bdl
P2O5	0.09775	0.08	0.169	0.173	0.107333	0.13875
Y2O3	0.4945	0.099	0.355	0.3245	0.49	0.37775
La2O3	bdl	0.1645	bdl	bdl	bdl	bdl
Ce2O3	bdl	0.1145	bdl	bdl	bdl	bdl
Pr2O3	bdl	bdl	bdl	0.1435	bdl	bdl
Nd2O3	bdl	bdl	bdl	bdl	bdl	bdl
Sm2O3	0.17425	bdl	bdl	bdl	0.153667	bdl
Eu2O3	bdl	bdl	bdl	bdl	bdl	bdl
Gd2O3	bdl	bdl	bdl	bdl	bdl	bdl
Dy2O3	bdl	bdl	bdl	bdl	bdl	0.153
Er2O3	0.13525	0.0975	bdl	bdl	0.139	bdl
Yb2O3	0.10425	bdl	0.0953333	0.1115	bdl	bdl
Total	100.934	100.987	99.8987	99.693	100.66	99.698
Zr/Hf w/w	42.663	51.3205	44.5119	52.0233	57.7	47.4826
formulae on the basis of 16 oxygens
Si	3.9721	3.99497	4.00961	4.02459	3.99607	4.005
Ti	0.0117782	0.00310941	--	--	--	--
Al	0.000682754	--	--	--	0.00387535	--
Fe2+	0.0747035	0.037818	0.01035	0.0324786	0.0694568	0.00570891
Mg	--	--	--	--	--	--
Ca	0.00219085	0.0029306	--	0.00289245	0.00761887	0.00256988
Zr	3.87991	3.91331	3.89456	3.86517	3.87766	3.90079
Hf	0.0464759	0.0389682	0.0447135	0.0379689	0.0343437	0.0419832
Th	--	--	--	--	--	0.0023376
U	--	--	--	0.00335886	--	0.00210088
Nb	--	--	--	--	--	--
P	0.0101029	0.00823375	0.0175331	0.0179731	0.0110775	0.0144492
Y	0.0320926	0.0063981	0.0231264	0.0211689	0.0317549	0.0247016
La	--	0.00736873	--	--	--	--
Ce	--	0.00509149	--	--	--	--
Pr	--	--	--	0.00640984	--	--
Nd	--	--	--	--	--	--
Sm	0.00732145	--	--	--	0.00644734	--
Eu	--	--	--	--	--	--
Gd	--	--	--	--	--	--
Dy	--	--	--	--	--	0.0060571
Er	0.00518075	0.0037191	--	--	0.00531676	--
Yb	0.00387776	--	0.00355952	0.00416893	--	--
Σcations	8.04642	8.02192	8.00345	8.01618	8.04362	8.0057
FeO* = total iron as Fe2+; bdl = below detection limit; N = number of analyses averaged
PbO, SrO = bdl

## Sheet: HydroTypeIZirc
Hydrothermal Type 1 zircon compositions
	Skye
	Eastern Redhills Centre		Western Redhills Centre		Strath na Creitheach Centre						Rum							Rum					Ardnamurchan			Ailsa Craig
Intrusion	Creag Strollamus Granite		Loch Ainort Granite		Ruadh Stac Granite						Western Granite							Western Granite [replacing baddeleyite]					Grigadale Granophyre			Ailsa Craig Granite
sample	H1226_Z1c	H1226_Z5c	H1554_Z4	H1554_Z5	RS1_Z1	RS1_Z2	RS1_Z3	RS1_Z4	RS1_Z5	RS1_Z6	RUM_Z9	RUM_Z1	RUM_Z13	RUM_Z3a	RUM_Z3b	RUM_Z12	RUM_Z21	RUM_ZB10	RUM_ZB2	RUM_ZB8	RUM_ZB9	RUM_ZB11	13138_Z7	13138_Z3	13138_Z8	DV24828_E34.1
N =	2	2	3	3	3	6	3	4	3	3	1	1	2	2	1	2	1	2	1	1	1	1	2	2	2	1
SiO2 wt%	31.565	31.645	31.9533	31.6833	31.4767	31.445	31.08	31.2075	31.4767	31.66	31.54	32.5	32.19	32.245	32.04	32.005	31.57	31.98	32.23	29.13	29.18	29.5	32.04	31.625	31.88	32.25
TiO2	0.0685	bdl	bdl	bdl	bdl	bdl	bdl	bdl	bdl	bdl	bdl	0.026	bdl	bdl	bdl	bdl	bdl	bdl	0.162	0.134	0.14	0.24	bdl	0.0405	0.045	0.06
Al2O3	bdl	bdl	bdl	bdl	bdl	bdl	0.0606667	bdl	bdl	bdl	bdl	bdl	bdl	bdl	bdl	0.0665	bdl	0.0165	1.105	1.15	1.6	0.953	bdl	bdl	bdl	bdl
FeO*	0.851	0.3455	0.521333	0.139	0.287667	0.0543333	1.41233	0.087	0.0613333	0.0536667	0.18	0.517	0.226	0.232	0.085	0.451	0.604	0.1085	0.531	0.45	1.33	0.464	0.1085	0.0955	0.071	0.02
MgO	bdl	bdl	bdl	bdl	bdl	bdl	bdl	bdl	bdl	bdl	bdl	bdl	bdl	bdl	bdl	bdl	bdl	bdl	bdl	0.123	0.092	bdl	bdl	bdl	bdl	bdl
CaO	0.114	0.16	bdl	0.022	bdl	bdl	0.0286667	bdl	bdl	bdl	0.036	bdl	0.044	0.0505	0.015	bdl	0.04	0.018	0.423	0.168	0.144	0.423	0.015	bdl	bdl	bdl
ZrO2	55.645	56.415	59.0833	58.36	56.1033	55.6667	57.63	55.185	54.9233	58.4967	56.05	60.25	59.95	59.55	62.67	60.4	59.6	61.705	58.99	58.24	56.87	61.89	61.26	59.025	62.595	63.24
HfO2	1.05	1.096	2.79333	1.38967	1.00567	1.2685	1.02733	0.71825	0.799	0.896667	1.28	1.067	0.76	0.754	1.77	0.579	1.34	1.265	1.059	0.998	0.697	1.4	1.44	1.2855	1.31	0.74
ThO2	1.033	1.2025	0.941333	0.638667	0.350667	0.192833	0.332	0.24625	0.329	0.256	1.33	1.6	0.521	0.4775	0.617	0.64	2.21	1.445	bdl	0.323	0.276	bdl	0.5335	1.1775	0.405	0.21
UO2	0.5265	0.5345	0.227	0.280333	bdl	0.0593333	0.0913333	0.12225	0.134333	0.102	0.369	0.485	0.344	0.3615	0.383	0.4235	0.698	0.484	0.155	0.29	0.208	0.14	0.209	0.456	0.19	0.27
Nb2O5	bdl	bdl	0.270667	0.099	bdl	bdl	bdl	bdl	bdl	bdl	bdl	bdl	bdl	bdl	0.115	bdl	bdl	0.084	0.137	0.084	0.201	0.664	bdl	bdl	bdl	bdl
P2O5	0.247	0.1805	0.320667	0.268	0.790333	0.726833	0.687	0.81175	0.620667	0.674667	0.458	0.271	0.198	0.208	0.153	0.258	0.318	0.193	0.248	0.379	0.399	0.167	0.3665	0.4395	0.269	0.35
Y2O3	5.035	4.525	2.80333	3.78433	5.75667	6.02333	4.07667	6.925	7.40333	5.17	5.76	2.66	3.655	3.8675	1.71	2.885	2.7	2.025	2.32	4.41	5.32	1.77	1.965	2.37	1.4575	1.9
La2O3	bdl	0.1335	bdl	bdl	0.122	bdl	bdl	bdl	bdl	bdl	0.105	bdl	bdl	bdl	bdl	bdl	bdl	bdl	bdl	0.264	bdl	bdl	0.1275	bdl	bdl	bdl
Ce2O3	0.143	0.099	bdl	bdl	0.107333	bdl	0.118333	bdl	0.131333	bdl	bdl	0.187	0.17	0.1355	bdl	0.097	0.156	bdl	0.178	0.113	0.191	0.245	bdl	bdl	bdl	bdl
Pr2O3	bdl	bdl	bdl	bdl	0.0993333	bdl	bdl	0.08375	bdl	bdl	0.169	0.1	bdl	bdl	0.21	bdl	bdl	bdl	bdl	bdl	0.1	0.1	bdl	bdl	bdl	bdl
Nd2O3	bdl	bdl	bdl	bdl	0.112333	bdl	bdl	bdl	0.142333	bdl	0.007	0.109	bdl	bdl	bdl	0.175	bdl	bdl	0.108	bdl	0.131	0.141	bdl	bdl	bdl	bdl
Sm2O3	bdl	0.1535	bdl	bdl	0.173333	bdl	bdl	bdl	bdl	bdl	bdl	bdl	bdl	bdl	bdl	bdl	bdl	bdl	bdl	bdl	bdl	bdl	bdl	bdl	bdl	bdl
Eu2O3	bdl	0.147	bdl	bdl	0.133	bdl	bdl	0.2235	0.196667	0.238	bdl	0.343	bdl	bdl	bdl	bdl	bdl	bdl	0.152	0.236	0.294	bdl	bdl	bdl	bdl	na
Gd2O3	0.256	0.1275	0.178667	0.211333	0.508	0.5265	0.237667	0.7285	0.65	0.503667	bdl	0.424	0.1455	0.21825	0.136	bdl	0.115	0.1805	0.24	0.467	0.147	bdl	0.257	0.1795	bdl	bdl
Dy2O3	0.3265	0.185	0.223333	0.384333	0.870667	0.806	0.285667	0.99475	1.165	0.581333	0.493	0.299	0.576	0.565	0.28	0.2165	0.497	bdl	0.482	0.234	0.286	bdl	bdl	bdl	bdl	bdl
Er2O3	0.7095	0.6645	0.287667	0.421667	0.658	0.622167	0.53	0.8285	0.513	0.597	0.751	0.5	0.3325	0.37425	0.128	0.2965	0.296	0.232	0.292	0.382	0.62	0.21	0.1705	0.3845	0.24	0.41
Yb2O3	1.175	1.265	0.511333	0.960333	0.396333	0.3655	0.346333	0.4375	0.315667	0.372667	0.905	0.47	0.6065	0.58175	0.368	0.5735	0.592	0.403	0.341	0.502	0.731	0.216	0.398	0.4815	0.3625	0.42
Total	98.745	98.879	100.115	98.642	98.9513	97.757	97.944	98.5995	98.8617	99.6023	99.433	101.808	99.7185	99.6208	100.68	99.0665	100.736	100.139	99.153	98.077	98.957	98.523	98.8905	97.56	98.825	99.87
Zr/Hf w/w	46.2663	44.9378	18.4659	36.6634	48.7038	38.3118	48.974	67.077	60.012	56.9545	38.2291	49.297	68.8658	68.9507	30.9111	91.0723	38.8302	42.5851	48.6307	50.947	71.2325	38.5941	37.1401	40.0859	41.7154	74.61
formulae on the basis of 16 oxygens
Si	4.02558	4.03337	3.99602	4.01312	3.98069	4.00625	3.94813	3.97066	3.99645	3.96347	3.99836	4.00812	4.01788	4.02688	3.96816	4.00803	3.96106	3.98365	3.99092	3.74706	3.7191	3.74048	4.00631	4.02112	3.98453	3.97808
Ti	0.00657252	--	--	--	--	--	--	--	--	--	--	0.0024124	--	--	--	--	--	--	0.015092	0.012968	0.0134245	0.0228947	--	0.00387427	0.00423145	0.00584659
Al	--	--	--	--	--	--	0.00907462	--	--	--	--	--	--	--	--	0.00980623	--	0.00242022	0.161117	0.174187	0.240127	0.142287	--	--	--	--
Fe2+	0.0907669	0.0368287	0.0545258	0.0147245	0.0304253	0.00578933	0.150046	0.0092576	0.00651265	0.00561881	0.0190839	0.0533241	0.0235917	0.0242309	0.00880421	0.0472351	0.0633796	0.0113034	0.0549898	0.0484104	0.141768	0.0492038	0.0113464	0.0101554	0.00742151	0.00185691
Mg	--	--	--	--	--	--	--	--	--	--	--	--	--	--	--	--	--	--	--	0.0235855	0.0174795	--	--	--	--	--
Ca	0.0155784	0.0218513	--	0.00298585	--	--	0.00390195	--	--	--	0.00489009	--	0.00588468	0.00675759	0.00199059	--	0.00537764	0.00240253	0.0561238	0.0231555	0.0196657	0.0574698	0.00200973	--	--	--
Zr	3.46075	3.50653	3.60327	3.60485	3.46002	3.45862	3.5701	3.4241	3.40066	3.57122	3.46511	3.62356	3.6491	3.62668	3.7851	3.68868	3.64674	3.74838	3.56215	3.65336	3.53473	3.82689	3.73551	3.65993	3.81521	3.80414
Hf	0.0382263	0.0398771	0.0997204	0.0502472	0.0363056	0.0461346	0.0372539	0.0260873	0.0289589	0.0320439	0.0463212	0.037564	0.0270794	0.0268799	0.0625777	0.0206986	0.0479946	0.0449825	0.0374333	0.0366464	0.0253592	0.0506738	0.0514002	0.0466593	0.046739	0.0260571
Th	0.0299862	0.0348856	0.0267949	0.018413	0.010094	0.005592	0.00959946	0.00713146	0.00950779	0.00729462	0.0383769	0.0449134	0.0148017	0.0135731	0.0173932	0.0182428	0.0631143	0.0409703	--	0.00945695	0.00800681	--	0.015184	0.0340781	0.0115216	0.00578374
U	0.0149437	0.0151617	0.00631794	0.0079025	--	0.00168238	0.00258213	0.00346171	0.00379584	0.00284186	0.0104108	0.0133118	0.00955593	0.0100474	0.0105568	0.0118033	0.0194909	0.013418	0.00427152	0.00830208	0.00590003	0.00395068	0.00581617	0.0129039	0.00528507	0.00727491
Nb	--	--	0.0153346	0.00568086	--	--	--	--	--	--	--	--	--	--	0.00645241	--	--	0.00474034	0.0076853	0.00489505	0.0116058	0.0381418	--	--	--	--
P	0.0266715	0.019479	0.0339541	0.0287418	0.0846266	0.0784059	0.0738915	0.0874487	0.0667224	0.0715124	0.0491601	0.0282979	0.0209251	0.0219936	0.0160441	0.0273564	0.0337825	0.0203558	0.0260011	0.0412779	0.0430579	0.0179287	0.038802	0.0473154	0.0284668	0.0363455
Y	0.341395	0.306631	0.186389	0.254845	0.387058	0.407999	0.275328	0.468445	0.499745	0.344105	0.38822	0.174411	0.242548	0.256786	0.112597	0.192085	0.180109	0.134111	0.152734	0.301595	0.360495	0.11932	0.130632	0.160214	0.0968506	0.124604
La	--	0.00627033	--	--	0.00568559	--	--	--	--	--	0.00490519	--	--	--	--	--	--	--	--	0.0125141	--	--	0.00587502	--	--	--
Ce	0.00667141	0.0046159	--	--	0.0049655	--	0.00549891	--	0.00609986	--	--	0.00843643	0.00776218	0.0061902	--	0.00444369	0.00716013	--	0.00806291	0.00531726	0.00890522	0.011364	--	--	--	--
Pr	--	--	--	--	0.00457311	--	--	0.00387914	--	--	0.00779927	0.00448957	--	--	0.00946809	--	--	--	--	--	0.0046398	0.00461585	--	--	--	--
Nd	--	--	--	--	0.00507014	--	--	--	0.00644962	--	--	0.00479762	--	--	--	0.00782154	--	--	0.00477285	--	0.00595889	0.00638066	--	--	--	--
Sm	--	0.00673429	--	--	0.00754523	--	--	--	--	--	--	--	--	--	--	--	--	--	--	--	--	--	--	--	--	--
Eu	--	0.0063905	--	--	0.00573688	--	--	0.00969921	0.0085167	0.0101624	--	0.014428	--	--	--	--	--	--	0.00641965	0.0103542	0.0127807	--	--	--	--	---
Gd	0.0108102	0.00538075	0.00739818	0.00886317	0.0212717	0.0222103	0.00999651	0.0306905	0.0273255	0.0208775	--	0.0173138	0.00601324	0.00902466	0.00557706	--	0.00477755	0.00744474	0.00983997	0.0198901	0.00620354	--	0.0106403	0.00755702	--	--
Dy	0.0134028	0.00758967	0.00898987	0.0156693	0.0354413	0.033053	0.0116804	0.0407387	0.0476102	0.023425	0.0201167	0.0118691	0.0231413	0.0227114	0.011162	0.00872689	0.0200716	--	0.0192109	0.00968847	0.011733	--	--	--	--	--
Er	0.0283941	0.0265773	0.0112889	0.01676	0.0261125	0.024874	0.0211271	0.0330787	0.0204388	0.0234526	0.0298753	0.01935	0.0130233	0.0146663	0.00497461	0.0116517	0.0116542	0.00906866	0.0113461	0.0154194	0.0247969	0.00835559	0.00669005	0.0153414	0.00941287	0.0157153
Yb	0.0456627	0.0491309	0.0194857	0.0370659	0.0152732	0.0141898	0.0134062	0.0169622	0.0122128	0.0142163	0.0349599	0.0176627	0.0230679	0.0221383	0.0138882	0.021885	0.022634	0.0152971	0.0128667	0.0196769	0.0283904	0.00834565	0.0151648	0.0186558	0.013806	0.0157868
Σcations	8.15541	8.1273	8.06949	8.07987	8.12089	8.1048	8.14161	8.13164	8.14101	8.09024	8.11759	8.08427	8.08438	8.08856	8.03474	8.07846	8.08735	8.03855	8.14103	8.17777	8.24413	8.1083	8.03539	8.03781	8.02347	8.02149
FeO* = total iron as Fe2+; bdl = below detection limit; na = not analyzed; N = number of analyses averaged; PbO, SrO = bdl

## Sheet: HydroType2Zirc
Hydrothermal Type 2 zircon compositions
	Skye									Ardnamurchan
	Eastern Redhills Centre			Western Redhills Centre
Intrusion	Creag Strollamus Granite			N. Porphyritic Felsite		Loch Ainort	Maol Gain.	Glamaig Granite		Grigadale Gran.
analysis	H1226_Z1rim	H1226_Z3	H1226_Z5rim	NPFx1_Z1rim	NPFx1_Z4	H1554_Z1c	14709_Z1	GLE2_Z2	GLE2_Z7brim	13138_Z2
N =	2	3	2	3	2	2	2	4	2	4
wt.%
SiO2	32.515	32.49	32.31	31.8867	31.66	31.71	31.76	32.33	31.99	32.4225
TiO2	0.039	bdl	bdl	bdl	bdl	bdl	bdl	bdl	bdl	0.05375
Al2O3	bdl	0.019	bdl	bdl	bdl	0.0495	0.0465	0.081	0.4155	0.08075
FeO*	0.5455	0.0946667	0.034	0.348667	0.469	1.1415	0.1455	0.16075	0.352	0.123
MgO	bdl	bdl	bdl	bdl	bdl	0.032	bdl	bdl	bdl	bdl
CaO	0.1015	0.019	bdl	bdl	0.159	0.173	bdl	0.0495	0.208	bdl
ZrO2	62.93	62.8367	63.64	64.3633	62.625	57.255	59.825	62.42	57.4	62.7575
HfO2	2.515	3.11	2.435	1.42333	2.3	2.35	1.81	2.1375	1.45	1.6125
ThO2	0.192	0.0673333	0.266	0.231333	0.096	1.275	0.898	0.378	2.25	0.34775
UO2	0.1665	0.132333	0.2825	0.271333	0.147	0.221	0.3415	0.4045	1.33	0.178
Nb2O5	bdl	bdl	bdl	bdl	bdl	0.423	0.1295	bdl	bdl	bdl
P2O5	0.0665	0.096	0.0885	0.450333	0.2035	0.4	0.54	0.24575	0.363	0.24925
Y2O3	0.372	0.284667	0.471	1.22833	0.6915	3.36	2.265	0.65525	2.105	1.3
La2O3	bdl	bdl	bdl	bdl	bdl	bdl	bdl	bdl	bdl	bdl
Ce2O3	bdl	bdl	bdl	bdl	bdl	0.1425	0.116	bdl	bdl	bdl
Pr2O3	bdl	0.122667	bdl	bdl	bdl	bdl	0.1575	bdl	bdl	bdl
Nd2O3	bdl	bdl	bdl	bdl	bdl	bdl	bdl	bdl	bdl	bdl
Sm2O3	bdl	bdl	bdl	bdl	bdl	bdl	bdl	bdl	0.14	bdl
Eu2O3	bdl	bdl	bdl	bdl	bdl	bdl	bdl	bdl	bdl	bdl
Gd2O3	0.235	bdl	bdl	0.156333	bdl	0.173	0.12	0.12	0.1705	bdl
Dy2O3	bdl	bdl	bdl	bdl	bdl	0.1885	0.224	bdl	bdl	bdl
Er2O3	0.1055	0.1	0.1545	0.200333	bdl	0.456	0.3405	0.1905	0.2115	0.16325
Yb2O3	0.15	0.167667	0.184	0.484	0.1	0.582	0.416	0.34825	0.668	0.25825
Total	99.9335	99.54	99.8655	101.044	98.451	99.932	99.135	99.521	99.0535	99.5465
Zr/Hf w/w	21.8448	17.6393	22.817	39.4784	23.771	21.2703	28.8557	25.4945	34.5599	33.9777
formulae on the basis of 16 oxygens
Si	4.022	4.032	4.00282	3.91731	3.97448	3.98382	3.98634	4.01363	4.03818	4.01032
Ti	0.0036289	--	--	--	--	--	--	--	--	0.00500184
Al	--	0.00277646	--	--	--	0.00732279	0.00687251	0.0118409	0.0617604	0.011761
Fe2+	0.0564238	0.00982523	0.00352276	0.0358232	0.04924	0.119937	0.0152733	0.0166901	0.0371612	0.0127237
Mg	--	--	--	--	--	0.00599298	--	--	--	--
Ca	0.0134509	0.00252649	--	--	0.0213875	0.0232886	--	0.00658462	0.0281338	--
Zr	3.79552	3.80281	3.84485	3.85601	3.83388	3.50782	3.66183	3.77899	3.53349	3.78546
Hf	0.0887933	0.110174	0.0861148	0.0499155	0.0824228	0.0842794	0.0648519	0.0757509	0.0522504	0.0569354
Th	0.00540495	0.00190195	0.00750082	0.00646867	0.00274308	0.0364596	0.0256548	0.0106812	0.0646475	0.00979034
U	0.00458295	0.00365492	0.00778907	0.00741857	0.00410701	0.00617923	0.00953945	0.0111761	0.0373647	0.00489994
Nb	--	--	--	--	--	0.0240753	0.00736363	--	--	--
P	0.00696372	0.0100872	0.00928324	0.0468425	0.0216302	0.0425491	0.0573873	0.0258317	0.0387976	0.0261033
Y	0.0244608	0.018782	0.0310231	0.0802288	0.0461527	0.224428	0.151146	0.0432488	0.141273	0.0854892
La	--	--	--	--	--	--	--	--	--	--
Ce	--	--	--	--	--	0.00654903	0.00532613	--	--	--
Pr	--	0.00554171	--	--	--	--	0.00719651	--	--	--
Nd	--	--	--	--	--	--	--	--	--	--
Sm	--	--	--	--	--	--	--	--	0.00608304	--
Eu	--	--	--	--	--	--	--	--	--	--
Gd	0.00962343	--	--	0.00635917	--	0.00719647	0.00498707	0.00493268	0.00712632	--
Dy	--	--	--	--	--	0.00762261	0.00904964	--	--	--
Er	0.00409447	0.00389424	0.00600634	0.00772297	--	0.0179772	0.0134111	0.00742129	0.00837788	0.00633634
Yb	0.00565308	0.00634043	0.00694621	0.0181186	0.00382535	0.0222806	0.0159107	0.0131742	0.025695	0.00973362
Σcations	8.0406	8.01031	8.00586	8.03222	8.03987	8.12778	8.04214	8.01995	8.08034	8.02456
FeO* = total iron as Fe2+; bdl = below detection limit; N = number of analyses averaged; PbO, SrO = bdl

## Sheet: HydroType2AilsaCraig
Hydrothermal Type 2 zircon from Ailsa Craig Granite
	Ailsa Craig sample DV24828
analysis	EZ16.1	EZ25.1	EZ35.1	EZ36.1	EZ36.2	EZ37.1	EZ38.1	EZ39.1
N =	1	1	1	1	1	1	1	1
wt.%
SiO2	32.2	29.93	29.81	30.79	30.57	28.16	31.06	32.22
TiO2	0.418	0.713	0.918	0.572	0.524	0.676	0.347	0.403
Al2O3	1.146	1.784	1.207	1.277	1.444	1.99	1.126	1.274
FeO*	1.34	1.16	1.155	1.42	1.32	0.575	1.166	1.08
MnO	0.114	0.071	0.167	0.086	0.043	0.018	0.121	0.087
MgO	bdl	bdl	bdl	bdl	0.405	0.237	bdl	bdl
CaO	2.37	0.989	2.05	2.82	2.47	1.086	3.22	2.94
K2O	0.027	0.03	bdl	bdl	0.176	0.079	0.2	0.128
ZrO2	47.65	45.17	44.43	49.52	46.78	45.79	39.84	39.85
HfO2	1.144	1.158	0.946	0.997	1.06	1.26	0.91	1.06
ThO2	bdl	bdl	0.239	bdl	0.358	bdl	0.073	0.328
UO2	bdl	bdl	0.329	0.445	0.308	0.152	0.33	0.331
Nb2O5	0.406	0.997	1.53	0.893	0.717	0.882	2.56	2.33
Ta2O5	0.222	bdl	bdl	0.375	0.217	bdl	0.092	0.297
P2O5	0.175	3.5	1.288	0.208	0.39	3.17	0.092	0.017
Y2O3	3.26	4.42	5.34	3.81	4.73	4.18	4.98	6.2
La2O3	0.603	0.592	0.165	0.176	0.18	0.379	0.767	0.545
Ce2O3	1.108	1.68	0.711	0.425	0.53	1.84	1.16	1.19
Pr2O3	0.1	0.46	0.1	bdl	bdl	0.25	0.172	0.1
Nd2O3	0.443	0.844	0.621	0.292	bdl	0.684	0.743	1.008
Sm2O3	0.294	0.378	0.119	bdl	0.277	0.283	0.16	0.489
Gd2O3	0.12	0.192	0.728	0.131	0.652	0.291	0.701	0.473
Dy2O3	0.49	0.469	0.99	0.613	0.843	0.39	0.888	0.951
Er2O3	0.407	0.376	0.431	0.432	0.582	0.397	0.779	0.648
Yb2O3	0.108	0.143	0.475	0.226	0.303	0.272	0.447	0.343
Cl	0.202343	0.0660879	bdl	bdl	0.0758787	0.172971	bdl	bdl
-O≡Cl	0.0457296	0.0149359	---	---	0.0171486	0.0390914	---	---
Total	94.3931	95.137	93.749	95.508	94.972	93.2531	91.934	94.292
Zr/Hf w/w	36.3634	34.0541	41.0028	43.3624	38.5285	31.7269	38.2213	32.8209
formulae on the basis of 16 oxygens
Si	4.167	3.80828	3.92391	3.9711	3.98025	3.69012	4.17764	4.21972
Ti	0.0407053	0.0682544	0.0909113	0.0555029	0.0513293	0.0666458	0.0351138	0.0397084
Al	0.174666	0.267292	0.187082	0.193937	0.221386	0.307064	0.178335	0.19647
Fe2+	0.145056	0.12344	0.127149	0.153167	0.143736	0.063016	0.131161	0.118293
Mn	0.0124989	0.0076523	0.0186202	0.0093953	0.00474236	0.00199798	0.0137856	0.00965136
Mg	--	--	--	--	0.0786067	0.0462962	--	--
Ca	0.328699	0.134838	0.289138	0.389713	0.344593	0.152487	0.464066	0.412572
K	0.00445863	0.00486996	--	--	0.0292354	0.0132074	0.0343195	0.021387
Zr	3.007	2.80281	2.85203	3.1146	2.97027	2.92617	2.61318	2.54512
Hf	0.04227	0.0420612	0.0355466	0.0367068	0.0393977	0.0471333	0.0349398	0.0396291
Th	--	--	0.00716066	--	0.0106095	--	0.00223486	0.00977756
U	--	--	0.00963809	0.0127732	0.00892492	0.00443292	0.00987829	0.00964772
Nb	0.0237589	0.0573538	0.0910527	0.0520711	0.0422065	0.0522541	0.155673	0.137962
Ta	0.00781656	--	--	0.0131565	0.00768566	--	0.00336608	0.0105809
P	0.0191788	0.377066	0.143549	0.0227139	0.0429939	0.351718	0.0104772	0.0018851
Y	0.224341	0.299006	0.373709	0.261253	0.327425	0.291219	0.356118	0.431703
La	0.0287621	0.0277582	0.00800364	0.00836489	0.00863643	0.0183018	0.0380164	0.0263028
Ce	0.0524632	0.0781971	0.0342362	0.0200516	0.0252435	0.0882032	0.0570751	0.0570118
Pr	0.00482719	0.0213072	0.00479186	--	--	0.011926	0.0084218	0.0054816
Nd	0.0204645	0.0383272	0.0291736	0.0134408	--	0.0319893	0.0356665	0.0471152
Sm	0.0130986	0.0165552	0.00539169	--	0.0124141	0.0127648	0.00740748	0.0220439
Gd	0.00514289	0.00808898	0.0317291	0.00559425	0.0281082	0.0126261	0.0312189	0.0205111
Dy	0.0204146	0.0192081	0.0419451	0.0254478	0.035329	0.0164498	0.0384442	0.0400892
Er	0.0165312	0.0150128	0.0178027	0.0174839	0.0237789	0.0163249	0.0328791	0.0266309
Yb	0.00425972	0.00554447	0.0190525	0.008882	0.0120215	0.0108612	0.0183205	0.0136884
Cl	0.0443947	0.0142538	--	--	0.0167464	0.0384208	--	--
Total	8.40781	8.23718	8.34162	8.38536	8.46568	8.27162	8.48774	8.46298
FeO* = total iron as Fe2+; bdl = below detection limit; N = number of analyses averaged
PbO, SrO = not analysed
