# Supplementary material for: Zirconium-bearing accessory minerals in UK Paleogene granites: textural, compositional, and paragenetic relationships
Source: Copernicus journal article supplement (doi:10.5194/ejm-33-537-2021), 2021-09-23
Supplement: Supplementary file 3 [file Supplementary Table 3.xlsx]

## Sheet: baddeleyite
Compositions of baddeleyite
	Ardnamurchan					Rum
Intrusion	Grigadale Granophyre				Grano.Cen.2	Western Granite
analysis	13138_B4	13138_B2a	13138_B2b	13138_B2c	14724_B4	RUM_B2a	RUM_B2b	RUM_B2.2	RUM_B1a	RUM_B7a	RUM_B7b
N =	1	1	1	1	1	2	4	1	1	1	1
wt.%
SiO2	bdl	bdl	0.04	bdl	1.02	0.401	0.31375	0.39	0.33	0.93	bdl
TiO2	0.78	0.348	0.688	0.396	0.47	1.915	1.95525	1.96	0.76	1.05	1
Al2O3	bdl	bdl	bdl	bdl	0.25	0.0925	0.03275	0.13	0.44	0.96	0.53
FeO*	0.507	0.117	0.203	0.165	3.07	0.8395	0.78775	0.95	0.36	3.65	2.33
MgO	bdl	bdl	bdl	bdl	bdl	bdl	bdl	bdl	bdl	0.08	bdl
CaO	0.021	0.023	bdl	bdl	bdl	0.039	bdl	bdl	0.16	0.04	0.05
ZrO2	95.84	95.13	97.34	96.66	85.74	91.38	90.51	90.42	92.45	88.41	90.02
HfO2	1.31	3.47	1.079	1.062	4.08	1.58	1.6175	1.71	1.74	1.75	1.8
ThO2	bdl	bdl	bdl	bdl	bdl	0.086	0.1675	0.09	bdl	bdl	bdl
UO2	0.063	0.121	0.136	bdl	bdl	0.2345	0.34425	0.25	0.41	0.28	bdl
Nb2O5	1.065	0.438	0.799	0.938	2.07	2.715	2.9475	2.97	0.86	1.76	1.8
Y2O3	0.42	bdl	0.097	0.255	0.18	0.433	0.40875	0.4	1.29	0.31	0.23
La2O3	bdl	bdl	bdl	0.121	bdl	bdl	bdl	bdl	bdl	bdl	bdl
Ce2O3	0.126	bdl	bdl	bdl	bdl	bdl	bdl	bdl	bdl	bdl	bdl
Pr2O3	bdl	bdl	bdl	0.237	bdl	0.1245	0.1	0.25	bdl	bdl	bdl
Nd2O3	0.239	bdl	bdl	bdl	bdl	0.157	0.1	0.13	0.1	bdl	bdl
Sm2O3	bdl	0.168	bdl	bdl	bdl	bdl	bdl	bdl	0.232	bdl	bdl
Eu2O3	bdl	bdl	bdl	bdl	bdl	bdl	bdl	bdl	bdl	bdl	bdl
Gd2O3	bdl	bdl	bdl	bdl	bdl	bdl	bdl	bdl	bdl	bdl	bdl
Dy2O3	bdl	0.204	bdl	0.208	0.19	bdl	0.15375	bdl	0.15	bdl	bdl
Er2O3	bdl	bdl	bdl	bdl	0.1	0.2325	0.13625	0.29	0.24	bdl	bdl
Yb2O3	0.146	bdl	bdl	bdl	bdl	0.1725	0.21825	0.11	0.167	bdl	0.35
Total	100.517	100.019	100.382	100.042	97.17	100.402	99.7933	100.05	99.689	99.22	98.11
formulae on the basis of 4 oxygens
Si	--	--	0.00163276	--	0.043	0.0162468	0.0128238	0.0158665	0.013631	0.038	--
Ti	0.0239936	0.0108659	0.0211286	0.0122437	0.015	0.0583728	0.0601249	0.0599916	0.0236181	0.032	0.031
Al	--	--	--	--	0.013	0.00441299	0.00157621	0.00622769	0.021401	0.046	0.026
Fe2+	0.0173366	0.00406097	0.00693002	0.00567098	0.109	0.0284459	0.0269276	0.0323232	0.0124363	0.124	0.081
Mg	--	--	--	--	--	--	--	--	--	0.005	--
Ca	0.000920015	0.0010228	--	--	0.001	0.0016931	--	--	0.00708152	0.002	0.002
Zr	1.91095	1.92534	1.93765	1.93716	1.769	1.80549	1.80406	1.79391	1.86226	1.757	1.827
Hf	0.0152898	0.0411101	0.0125729	0.0124587	0.049	0.0182739	0.0188724	0.0198592	0.0205169	0.02	0.021
Th	--	--	--	--	--	0.000793086	0.00155828	0.000833406	--	--	--
U	0.000573272	0.00111762	0.00123549	--	--	0.00211449	0.00313145	0.00226357	0.00376908	0.003	--
Nb	0.0197269	0.00823513	0.0147753	0.0174634	0.04	0.0498335	0.0545777	0.0547394	0.0160931	0.032	0.034
Y	0.0091299	--	0.00210509	0.00557152	0.004	0.0093271	0.00888233	0.00865189	0.0283294	0.007	0.005
La	--	--	--	0.00183244	--	--	--	--	--	--	--
Ce	0.00188457	--	--	--	--	--	--	--	--	--	--
Pr	--	--	--	0.00354563	--	0.00183628	0.00148792	0.00370257	--	--	--
Nd	0.00348756	--	--	--	--	0.0022702	0.00145873	0.00188756	0.00147419	--	--
Sm	--	0.00239993	--	--	--	--	--	--	0.00329854	--	--
Eu	--	--	--	--	--	--	--	--	--	--	--
Gd	--	--	--	--	--	--	--	--	--	--	--
Dy	--	0.00272513	--	0.00275138	0.003	--	0.00175961	--	0.00199431	--	--
Er	--	--	--	--	0.001	0.00295596	0.00174752	0.00370226	0.00311083	--	--
Yb	0.00181901	--	--	--	--	0.00212968	0.00271825	0.00136367	0.00210199	--	0.004
Σcations	2.00511	1.99688	1.99803	1.9987	2.047	2.0042	2.00171	2.00532	2.02112	2.066	2.031
FeO* = total iron as Fe2+; bdl = below detection limit; N = number of analyses averaged; PbO, P2O5 = bdl

## Sheet: zirconolite
Compositions of zirconolite
						Skye
	Ardnamurchan					East. Redhills Centre
	Grig. Grano.	Granophyre, Centre 2				Glamaig Granite
analysis	13138_ZLa	14724-ZL2	14724-ZL3	14724-ZL4	14724-ZL2b	GLE2a	GLE2b
N =	1	1	2	1	1	1	1
wt.%
SiO2	1.983	0.596	1.374	0.439	2.38	0.1	0.08
TiO2	26.78	27.34	23.14	23.4	26.58	23.07	21.43	`
Al2O3	0.143	0.243	0.6305	0.123	0.108	0.18	0.16
FeO*	10.82	10.52	8.58	10.17	9.67	9.77	10.04
MnO	na	na	na	na	na	0.22	0.21
MgO	0.24	bdl	bdl	bdl	bdl	bdl	bdl
CaO	3.19	2.9	5.335	4.2	3.47	3.92	4.12
SrO	bdl	bdl	bdl	bdl	bdl	bdl	bdl
BaO	na	na	na	na	na	0.09	0.1
PbO	0.186	bdl	0.1	bdl	bdl	na	na
ZrO2	23.22	27.56	27.98	27.44	27.95	28.35	27.33
HfO2	0.79	0.953	1.1915	0.9	0.844	na	na
ThO2	1.61	0.789	1.1275	1.58	0.988	3.63	3.7
UO2	0.987	0.326	0.575	0.784	0.303	2.18	2.55
Nb2O5	4.1	0.864	7.81	7.14	1.253	5.79	7.34
Ta2O5	na	na	na	na	na	bdl	0.12
P2O5	0.06	0.065	0.1245	0.048	0.051	bdl	bdl
Y2O3	11.43	10	7.97	10.09	10.03	9.93	9.3
La2O3	0.1	0.12	0.464	0.452	0.462	0.17	0.27
Ce2O3	1.033	2.12	2.575	2.65	2.03	1.66	1.66
Pr2O3	0.241	0.402	0.398	0.108	0.413	0.27	bdl
Nd2O3	1.52	2.78	2.695	1.87	2.81	1.34	1.29
Sm2O3	0.833	0.81	0.9625	0.5	1.07	0.34	0.32
Eu2O3	0.14	bdl	bdl	0.155	0.14	bdl	bdl
Gd2O3	0.998	1.56	0.972	1.122	1.107	0.96	1.11
Tb2O3	na	na	na	na	na	bdl	bdl
Dy2O3	1.52	1.49	1.29	0.853	1.86	1	1.17
Ho2O3	na	na	na	na	na	0.28	bdl
Er2O3	1.49	1.21	0.776	0.991	1.19	na	na
Yb2O3	1.22	0.763	0.6935	1.011	0.559	1.03	1.1
Total	94.644	93.411	96.76	96.026	95.272	94.28	93.4
ΣREE	9.095	11.255	10.826	9.712	11.641	7.05	6.92
ΣREE+Y	20.525	21.255	18.796	19.802	21.671	16.98	16.22
formulae on the basis of 7 oxygens
Si	0.139229	0.0428043	0.0948453	0.0310708	0.165612	0.00727789	0.0059239
Ti	1.40911	1.47726	1.20138	1.24601	1.39152	1.2632	1.19387
Al	0.0118225	0.0205502	0.0512432	0.0102509	0.00884926	0.0154257	0.013951
Fe2+	0.633343	0.631877	0.495191	0.601982	0.562752	0.594669	0.621765
Mn	--	--	--	--	--	0.0135625	0.0131719
Mg	0.0251192	--	0.00123542	--	--	--	--
Ca	0.239189	0.223169	0.394496	0.318516	0.258725	0.305693	0.326895
Sr	--	--	--	--	--	--	--
Ba	--	--	--	--	--	0.00256748	0.00290254
Pb	0.00351582	--	0.002	--	--	--	--
Zr	0.79204	0.965253	0.94163	0.947093	0.948458	1.00619	0.986911
Hf	0.0161884	0.0195382	0.023474	0.0181836	0.0167652	--	--
Th	0.0257294	0.0128978	0.017711	0.0254532	0.0156484	0.0601326	0.0623616
U	0.0154227	0.00521071	0.00883358	0.0123493	0.00469241	0.0353102	0.0420239
Nb	0.130412	0.0281114	0.244173	0.228936	0.0394997	0.190515	0.24573
Ta	--	--	--	--	--	--	0.00241716
P	0.00356685	0.00395259	0.00727805	0.00287644	0.00300478	--	--
Y	0.425465	0.381836	0.292423	0.379677	0.371066	0.384229	0.36613
La	0.00258733	0.00317592	0.0118003	0.0117889	0.0118469	0.00455933	0.00736763
Ce	0.0255317	0.0556976	0.0650032	0.0686108	0.0516738	0.0441949	0.044966
Pr	0.00615984	0.0105103	0.00999989	0.00278265	0.0104619	0.00715346	--
Nd	0.0380882	0.071257	0.0663714	0.0472357	0.0697852	0.0348058	0.0340917
Sm	0.0201313	0.0200238	0.0228616	0.0121809	0.0256283	0.00851737	0.00815621
Eu	0.00339475	--	--	0.00374174	0.00294301	--	--
Gd	0.023201	0.0370967	0.0222058	0.0262936	0.0255054	0.0231338	0.0272151
Tb	--	--	--	--	--	--	--
Dy	0.0343509	0.0344442	0.028655	0.0194323	0.0416598	0.0234258	0.0278864
Ho	--	--	--	--	--	0.00647588	--
Er	0.032828	0.0272696	0.0168028	0.0220097	0.0259845	--	--
Yb	0.0261016	0.0166981	0.0145827	0.0218042	0.011853	0.0228425	0.0248206
Σcations	4.08072	4.08864	4.03308	4.05828	4.06393	4.05388	4.05856
ΣREE	0.213375	0.276173	0.258283	0.23588	0.277342	0.175109	0.174504
ΣREE+Y	0.63784	0.658009	0.550706	0.615557	0.648408	0.559338	0.540634
M8	0.91818	0.899286	0.971746	0.971875	0.927474	0.960473	0.971915
FeO* = total iron as Fe2+, N = number of analyses averaged
bdl = below detection limit, na = not analyzed, M8 = ΣREE+Y+U+Th+Ca

## Sheet: dalyite
Compositions of dalyite in Ailsa Craig Granite DV24828
analysis	D21.1-2	D7.1	D20.1	D3.1	D17.1-2	D23.1	D14.1-2	D2.1	D9.1	D10.1	D10.2	D11.1	D16.1	D19.1	D22.1
N =	2	1	1	1	2	1	2	1	1	1	1	1	1	1	1
wt.%
SiO2	63.24	64.1889	63.544	63.0333	62.9537	63.1174	63.37	63.1968	63.2861	63.2508	63.4448	63.5043	63.3456	63.6135	63.8912
TiO2	0.27	0.25	0.337333	0.06	0.4585	0.059	0.07	0.087	0.101	0.109	0.198	0.054	0.093	0.146	0.063
Al2O3	0.04	0.064	0.046	0.699	0.0385	0.502	0.05	0.901	0.041	0.07	0.127	0.061	0.048	0.032	0.06
FeO*	0.06	0.093	0.0666667	0.097	0.1415	0.108	0.07	0.191	0.125	0.09	0.138	0.021	0.097	0.102	0.063
MnO	bdl	bdl	bdl	0.018	bdl	bdl	0.02	bdl	bdl	bdl	bdl	bdl	bdl	bdl	bdl
MgO	bdl	bdl	bdl	bdl	bdl	bdl	bdl	0.023	bdl	bdl	0.018	bdl	bdl	bdl	bdl
CaO	bdl	0.021	bdl	bdl	bdl	0.023	bdl	bdl	bdl	0.018	bdl	bdl	bdl	bdl	bdl
BaO	bdl	0.08	0.051	bdl	0.06	bdl	bdl	bdl	bdl	bdl	bdl	bdl	bdl	bdl	bdl
Na2O	0.79	0.412	0.819667	0.592	0.5755	0.586	0.95	0.371	0.305	0.153	1.016	1.085	0.85	0.532	0.809
K2O	14.4	14.26	14.0633	15.13	14.26	14.67	14.64	14.82	14.52	15.52	14.42	14.5	14.61	14.46	14.74
ZrO2	20	20.7	20.0867	20.34	19.96	20.25	20.52	20.37	20.85	20.93	20.04	20.04	20.39	20.46	20.35
HfO2	0.45	0.635	0.534	0.403	0.463	0.469	0.49	0.346	0.433	0.45	0.446	0.548	0.54	0.631	0.458
P2O5	bdl	bdl	bdl	bdl	bdl	bdl	bdl	0.036	bdl	bdl	bdl	bdl	0.037	bdl	bdl
Total	99.24	100.264	99.554	100.371	98.9147	99.7844	100.16	100.342	99.6611	100.591	99.8478	99.8133	100.011	99.9765	100.434
formulae on the basis of 15 oxygens
Si	6.053	6.04598	6.0546	5.99292	6.04621	6.02015	6.034	5.99037	6.04502	6.02015	6.04154	6.05302	6.03639	6.05309	6.05308
Ti	0.019	0.0177365	0.0241756	0.00428964	0.0331247	0.00423308	0.005	0.00620332	0.007257	0.00780394	0.0141828	0.00387176	0.00666638	0.0104503	0.00448975
Al	0.005	0.00710652	0.00515918	0.0782161	0.0043538	0.0563713	0.005	0.100549	0.00461072	0.00784395	0.0142381	0.00684533	0.00538515	0.00358487	0.0066924
Fe2+	0.005	0.00733547	0.0053117	0.00771008	0.0113653	0.00861481	0.005	0.015141	0.00998535	0.00716386	0.0109899	0.00167399	0.00773029	0.00811694	0.0049916
Mn	--	--	0.000591704	0.00144889	--	--	0.002	--	--	--	--	--	--	--	--
Mg	--	--	--	--	--	--	--	0.0018464	--	--	0.00145165	--	--	--	--
Ca	--	0.00212189	--	--	--	0.00235022	--	--	--	0.00183542	--	--	--	--	--
Ba	--	0.00295647	0.00190273	--	0.00207279	--	--	--	--	--	--	--	--	--	--
Na	0.146	0.0763333	0.151412	0.109082	0.107154	0.108359	0.175	0.0681775	0.0564804	0.028232	0.187566	0.200497	0.157032	0.0981405	0.148591
K	1.758	1.72458	1.70898	1.8353	1.74699	1.78483	1.777	1.79191	1.76915	1.88426	1.75156	1.76297	1.77591	1.75512	1.78132
Zr	0.933	0.957	0.933011	0.942591	0.934695	0.941743	0.953	0.941453	0.971056	0.971313	0.930461	0.931355	0.947385	0.949255	0.940045
Hf	0.012	0.0170944	0.0145221	0.0109327	0.0126926	0.0127682	0.013	0.00936124	0.0118053	0.0122251	0.0121223	0.014909	0.0146877	0.0171378	0.0123851
P	--	--	--	--	--	--	--	0.00288879	--	--	--	--	0.00298482	--	--
Σcations	8.92862	8.86116	8.90012	8.98192	8.89817	8.93943	8.97	8.9279	8.87537	8.94083	8.96412	8.97515	8.95416	8.89489	8.9516
Σ(K+Na+Ba)	1.904	1.80387	1.8623	1.94439	1.85621	1.89319	1.952	1.86009	1.82563	1.9125	1.93913	1.96347	1.93294	1.85326	1.92991
Σ(Zr+Hf+Ti+Fe+Mn)	0.969	0.999166	0.977612	0.966972	0.991877	0.967359	0.978	0.974005	1.0001	0.998506	0.969208	0.95181	0.97647	0.98496	0.961911
FeO* = total iron as Fe2+, bdl = below detection limit, N = number of analyses averaged

## Sheet: eudialyte-group mineral
Compositions of probable eudialyte-group mineral in Ailsa Craig Granite DV24828
analysis	E9.1-2	E17.1	E18.1	E21.1	E23.1	E26.1	E32.1	E33.1	E14.1	E14.2	E9.1	E9.2	E10.1	E11.1	E20.1	E22.1	E24.1	E27.1	E29.1	E30.1	E31.1
N =	2	1	1	1	1	1	1	1	dark 1	light 1	1	1	1	1	1	1	1	1	1	1	1
wt.%
SiO2	50.3837	50.6019	50.3539	47.7946	49.7885	49.4909	50.6912	49.2528	52.01	52.7744	50.4035	50.3638	50.6714	50.7507	50.6317	51.5741	50.84	48.9651	51.5146	50.6515	50.3341
TiO2	0.404	0.415	0.295	0.679	0.66	0.375	0.5	0.554	0.277	0.38	0.43	0.378	0.451	0.542	0.629	0.333	0.317	0.324	0.607	0.539	0.567
Al2O3	bdl	bdl	bdl	bdl	bdl	bdl	bdl	bdl	0.03	0.032	bdl	bdl	bdl	bdl	bdl	bdl	bdl	bdl	bdl	bdl	bdl
FeO*	5.18	4.91	3.87	5.37	4.79	4.8	5.28	5.21	3.94	5.1	5.26	5.1	5.48	5.72	5.75	4.4	3.69	5.09	5.25	5.78	6.07
MnO	1.131	2.07	1.133	1.59	0.866	1.87	1.69	1.58	1.079	1.117	1.052	1.21	1.135	1.19	1.92	1.005	1.73	2.11	1.041	1.42	1.77
CaO	0.236	0.463	0.323	0.893	0.181	1.93	0.415	0.408	0.131	0.136	0.205	0.267	0.274	0.216	0.685	0.142	0.842	1.031	0.062	0.302	0.618
SrO	0.046	0.062	bdl	bdl	bdl	bdl	0.075	0.163	bdl	0.081	0.047	0.045	0.121	bdl	bdl	bdl	bdl	bdl	bdl	0.079	bdl
Na2O	13.88	11.77	13.35	14.15	14.06	11.32	13.38	14.11	13.83	11.74	14.66	13.1	13.45	13.46	12.03	12.96	11.65	12.1	13.82	12.67	10.53
K2O	0.481	0.401	0.465	0.387	0.396	0.37	0.336	0.359	0.164	0.275	0.417	0.545	0.385	0.331	0.409	0.37	0.406	0.377	0.392	0.422	0.532
ZrO2	14.69	11.24	13.17	12.54	15.29	9.15	12.22	12.22	16.04	12.88	16.17	13.21	15.54	14.77	11.48	15.79	11.11	10.68	15.36	13.27	11.17
HfO2	0.119	0.246	bdl	0.187	0.216	bdl	0.243	0.375	0.147	0.342	0.238	bdl	0.167	0.254	0.324	0.191	0.428	0.432	0.404	0.229	0.161
Nb2O5	1.1735	2.11	2.05	1.074	1.128	2.31	1.89	1.398	1.8	2.08	1.168	1.179	0.931	1.049	1.298	1.93	2.1	1.71	1.123	1.317	1.74
Ta2O5	0.1	bdl	0.322	0.122	bdl	0.192	0.099	bdl	bdl	bdl	0.172	bdl	bdl	bdl	bdl	0.322	0.182	bdl	bdl	bdl	0.262
P2O5	bdl	0.07	bdl	bdl	0.069	0.066	bdl	bdl	bdl	bdl	bdl	bdl	bdl	bdl	0.055	bdl	bdl	bdl	0.066	0.079	0.135
Y2O3	2.925	4.25	4.73	3.55	3.04	3.93	4.04	3.46	3.92	3.83	2.62	3.23	3.22	2.97	3.25	3.42	5.04	4.14	2.93	3.56	3.62
La2O3	0.7255	1.116	0.902	1.007	0.804	0.98	1.22	0.814	0.583	1.17	0.731	0.72	0.765	0.74	1.19	0.763	0.916	1.18	0.804	0.811	1.19
Ce2O3	2.015	2.79	2.45	2.56	2.22	3.21	3.07	2.63	1.62	2.89	1.87	2.16	2.2	2.16	2.69	2.17	2.55	3.11	2.01	2.6	2.66
Pr2O3	0.2585	0.204	0.16	0.16	0.412	0.387	0.41	0.912	bdl	0.388	0.291	0.226	0.239	0.188	0.251	bdl	0.525	0.659	bdl	0.522	0.342
Nd2O3	1.0265	1.86	1.34	1.83	1.017	2.15	1.6	1.39	1.078	1.37	1.054	0.999	0.871	1.35	1.71	0.601	1.49	1.61	1.129	2.08	1.56
Sm2O3	0.12	0.635	0.531	0.443	0.217	0.416	bdl	bdl	bdl	bdl	0.109	bdl	0.243	bdl	0.538	0.533	0.298	0.601	0.679	bdl	bdl
Gd2O3	0.3015	0.739	0.625	0.465	0.505	0.382	0.442	0.372	0.526	0.166	bdl	0.603	0.61	0.286	0.089	0.942	0.465	0.646	0.35	0.833	0.178
Dy2O3	0.484	0.8	0.547	0.15	0.353	0.975	0.665	0.877	0.484	0.778	0.551	0.417	0.486	0.507	0.264	0.583	0.555	0.571	0.299	0.543	0.33
Er2O3	0.467	0.543	0.433	0.689	0.347	0.308	0.265	0.363	0.51	0.474	0.451	0.483	0.197	0.234	0.276	0.221	0.443	0.182	0.502	0.533	0.418
Yb2O3	0.234	0.452	0.475	0.253	0.125	0.385	0.33	0.1	0.143	0.207	0.237	0.231	0.327	0.428	0.181	0.156	0.532	0.468	0.426	0.324	0.11
Cl	1.95	1.9908	2.01527	1.99896	2.11318	2.07239	1.93368	1.96632	2.01527	2.19477	1.98264	1.91736	1.91736	1.91736	1.94184	1.91736	1.98264	2.09686	1.92552	2.03159	2.1295
-O≡Cl	0.4407	0.44992	0.455452	0.451764	0.477579	0.468359	0.437012	0.444388	0.455452	0.496018	0.448076	0.433324	0.433324	0.433324	0.438856	0.433324	0.448076	0.473891	0.435168	0.45914	0.481267
Total	97.89	99.2888	99.0847	97.4358	98.1201	96.6009	100.358	98.0697	99.8718	99.9092	99.6711	95.9509	99.2474	98.6298	97.1537	99.8901	97.6436	97.6091	100.259	100.137	95.9453
ΣREE	5.57	9.14	7.46	7.55	6	9.19	8	7.46	4.94	7.44	5.294	5.839	5.938	5.893	7.189	5.969	7.774	9.027	6.199	8.246	6.788
ΣREE+Y	8.4915	13.389	12.193	11.102	9.04	13.123	12.042	10.918	8.864	11.273	7.914	9.069	9.158	8.863	10.439	9.389	12.814	13.167	9.129	11.806	10.408
cations on the basis of (Si+Ti+Al+Zr+Hf+Nb+Ta) = 29
Si	25.001	25.5567	25.1714	25.204	24.7606	25.9387	25.3555	25.3394	24.7538	25.3315	24.6678	25.3465	24.882	24.9842	25.5882	24.7053	25.5887	25.6716	24.8636	25.2434	25.5584
Ti	0.150832	0.15769	0.110947	0.269389	0.246942	0.147868	0.18816	0.214434	0.0991867	0.137227	0.158328	0.143123	0.166616	0.200743	0.239159	0.120011	0.120039	0.1278	0.220415	0.202099	0.216608
Al	--	--	--	--	--	--	--	--	0.016813	0.0180866	--	--	--	--	--	--	--	--	--	--	--
Fe	2.1498	2.07393	1.61793	2.36833	1.99225	2.10397	2.20876	2.24171	1.56829	2.04731	2.15294	2.14657	2.2505	2.35502	2.43031	1.76274	1.55326	2.23182	2.11918	2.40912	2.57772
Mn	0.475408	0.885561	0.47975	0.710231	0.364805	0.830188	0.716039	0.688547	0.434998	0.454153	0.436111	0.515818	0.472095	0.496228	0.821921	0.40779	0.737565	0.937044	0.425594	0.599453	0.761301
Ca	0.125487	0.25056	0.17301	0.504589	0.0964506	1.08386	0.222424	0.224916	0.0668068	0.0699473	0.107502	0.143981	0.144167	0.113939	0.370939	0.0728856	0.454098	0.579188	0.0320641	0.161271	0.336244
Sr	0.0132376	0.0181588	--	--	--	--	0.021755	0.0486309	--	0.0225466	0.0133391	0.0131332	0.0344561	--	--	--	--	--	--	0.0228319	--
Na	13.3556	11.5264	12.94	14.4687	13.5581	11.504	12.977	14.0758	12.7632	10.9266	13.9119	12.7836	12.8064	12.8484	11.7886	12.0377	11.3697	12.3008	12.9337	12.2437	10.3677
K	0.304522	0.258382	0.296557	0.260366	0.251252	0.247404	0.214417	0.235636	0.0995819	0.168404	0.260368	0.349927	0.241193	0.207889	0.263707	0.226122	0.260706	0.252167	0.24138	0.268318	0.34464
Zr	3.55497	2.76837	3.21056	3.22486	3.70818	2.33865	2.98079	3.0659	3.72289	3.01491	3.85924	3.24208	3.7213	3.54589	2.82931	3.68861	2.72696	2.7306	3.61531	3.22514	2.76596
Hf	0.0168574	0.0354668	--	0.0281503	0.0306645	--	0.0346973	0.0550741	0.0199721	0.0468613	0.0332504	--	0.0234093	0.035695	0.0467426	0.0261182	0.0614946	0.0646547	0.0556628	0.0325793	0.0233372
Nb	0.263282	0.481797	0.463311	0.256059	0.253621	0.547369	0.427411	0.325175	0.387322	0.451384	0.258439	0.268261	0.206689	0.233477	0.296577	0.417985	0.477867	0.405328	0.245052	0.296747	0.399453
Ta	0.0126091	--	0.0437861	0.0175008	--	0.0273736	0.0134704	--	--	--	0.0228984	--	--	--	--	0.0419586	0.0249184	--	--	--	0.0361893
P	--	0.0299339	--	--	0.0290542	0.0292884	--	--	--	--	--	--	--	--	0.0235346	--	--	--	0.0269715	0.0333358	0.0580408
Y	0.77171	1.1412	1.2571	0.995303	0.803787	1.09509	1.07437	0.946405	0.99192	0.9774	0.681721	0.864246	0.840647	0.777347	0.873245	0.871005	1.34868	1.15399	0.751859	0.943282	0.977274
La	0.132671	0.207706	0.16616	0.19569	0.147345	0.189276	0.224877	0.154325	0.102252	0.206952	0.131836	0.13353	0.13843	0.134246	0.221621	0.134688	0.169897	0.227979	0.143	0.148944	0.222672
Ce	0.365786	0.515467	0.448022	0.493845	0.403872	0.615443	0.561742	0.494972	0.282052	0.507452	0.334789	0.397661	0.395188	0.388988	0.497312	0.380258	0.469507	0.596466	0.354886	0.474011	0.494098
Pr	0.0466982	0.0375072	0.0291166	0.0307156	0.0745893	0.0738383	0.0746569	0.170808	--	0.067798	0.0518454	0.0414052	0.0427236	0.0336921	0.0461783	--	0.0961943	0.125776	--	0.0947051	0.0632187
Nd	0.1818	0.335268	0.239067	0.344417	0.180507	0.402165	0.285628	0.255224	0.183112	0.234693	0.1841	0.179435	0.152645	0.237191	0.308429	0.102748	0.267652	0.301255	0.194477	0.369965	0.282708
Sm	0.02	0.110391	0.0913671	0.0804112	0.0371461	0.0750478	--	--	--	--	0.0183619	--	0.0410724	--	0.0935882	0.0878835	0.0516274	0.108458	0.112804	--	--
Gd	0.0495393	0.123581	0.103448	0.0811923	0.083156	0.0662914	0.0732034	0.0633692	0.0828917	0.0263825	–	0.100482	0.0991796	0.0466186	0.0148928	0.14941	0.0774936	0.112142	0.0559334	0.137458	0.0299269
Dy	0.0773084	0.130052	0.0880137	0.0252173	0.0565062	0.164482	0.107066	0.145229	0.0741463	0.120201	0.0867982	0.0675499	0.0768153	0.0803378	0.0429448	0.089891	0.0899135	0.0963588	0.0464508	0.0871053	0.0539356
Er	0.0727214	0.0860577	0.0679227	0.114015	0.054152	0.0506556	0.0415947	0.0586037	0.076169	0.0713952	0.0692627	0.0762781	0.0303558	0.0361486	0.0437703	0.0332203	0.069968	0.0299427	0.0760308	0.0833558	0.0666042
Yb	0.0353843	0.0695628	0.0723551	0.040655	0.0189428	0.0614874	0.0502984	0.0156772	0.0207392	0.0302768	0.0353444	0.0354253	0.0489296	0.0642049	0.0278739	0.0227712	0.0815936	0.0747676	0.0626534	0.0492042	0.0170203
Cl	1.64026	1.70432	1.70763	1.78682	1.78137	1.84111	1.6395	1.71477	1.62583	1.78572	1.64475	1.63565	1.59593	1.59998	1.66348	1.55686	1.6915	1.86347	1.57532	1.71624	1.83289
Total	48.8172	48.5041	48.7775	51.4965	48.9333	49.4337	49.4934	50.5346	47.3719	46.7173	49.1209	48.4847	48.4107	48.4202	48.5324	46.936	47.7894	49.9916	48.1523	48.8423	47.486
ΣREE	0.981909	1.62	1.31	1.40616	1.06	1.7	1.42	1.36	0.32	1.27	0.912337	1.03177	1.02534	1.02143	1.29661	1.00087	1.37385	1.67315	1.04624	1.44475	1.23018
ΣREE+Y	1.75	2.76	2.56	2.405	1.86	2.79	2.49	2.3	1.81	2.24	1.59406	1.89601	1.86599	1.79877	2.16986	1.87188	2.72253	2.82714	2.47855	3.01205	2.8404
FeO* = total iron as Fe2+, bdl = below detection limit, N = number of analyses averaged

## Sheet: Zr-aegirine
Compositions of Zr-bearing aegirine
	Ailsa Craig Granite
analysis	E7.2	E12.1	E12.2	E13.1
N =	1	1	1	1
wt.%
SiO2	52.0602	52.2189	51.832	52.3082
TiO2	1.513	1.68	0.842	0.873
Al2O3	0.208	0.255	0.203	0.194
Fe2O3*	28.1321	28.1626	28.5455	28.8349
MnO	0.485	0.504	0.392	0.38
MgO	bdl	bdl	bdl	bdl
CaO	3.14	2.68	2.49	2.56
SrO	bdl	bdl	bdl	0.07
Na2O	12.2611	13.091	12.8045	12.765
K2O	0.02	bdl	bdl	bdl
ZrO2	2.19	2.5	2.66	3.07
HfO2	0.2	0.213	0.164	0.289
Nb2O5	0.219	0.266	bdl	bdl
Ta2O5	bdl	bdl	bdl	bdl
Y2O3	0.121	bdl	bdl	bdl
La2O3	bdl	bdl	bdl	0.098
Ce2O3	bdl	bdl	bdl	bdl
Pr2O3	bdl	bdl	0.135	bdl
Nd2O3	0.231	bdl	bdl	0.312
Sm2O3	bdl	0.155	bdl	bdl
Gd2O3	bdl	bdl	0.237	bdl
Dy2O3	bdl	bdl	bdl	bdl
Er2O3	bdl	bdl	bdl	bdl
Yb2O3	bdl	bdl	bdl	0.135
Total	100.78	101.725	100.305	101.889
formulae on the basis of 6 oxygens/4 cations
Si	1.99065	1.98127	1.99602	1.98959
Ti	0.0435259	0.0479561	0.0243948	0.024982
Al	0.0093653	0.0113926	0.00920516	0.00868888
Fe3+	0.731754	0.720549	0.756457	0.762436
Fe2+	0.112943	0.0927566	0.0899582	0.0920916
Mn	0.0157088	0.0161979	0.0127869	0.012243
Mg	--	--	--	--
Ca	0.128651	0.108955	0.102745	0.104335
Sr	--	--	--	0.00154401
Na	0.909075	0.963096	0.956115	0.941443
K	0.000975667	--	--	--
Zr	0.0408372	0.046257	0.049954	0.0569447
Hf	0.00218308	0.00230699	0.00180286	0.00313792
Nb	0.00378599	0.00456292	--	--
Ta	--	--	--	--
Y	0.00245986	--	--	--
La	--	--	--	0.00137362
Ce	--	--	--	--
Pr	--	--	0.00189255	--
Nd	0.00315242	--	--	0.00423536
Sm	--	0.00202427	--	--
Gd	--	--	0.00302194	--
Dy	--	--	--	--
Er	--	--	--	--
Yb	--	--	--	0.00156469
Σcations	3.99507	3.99733	4.00435	4.00461
%Ae**	87	89	89	89
Fe2O3* = all Fe as Fe3+, ** = method of Morimoto (1989)
Fe3+/Fe2+ based on stoichiometry
bdl = below detection limit, N = number of analyses averaged
