# Supplementary material for: Zirconium-bearing accessory minerals in UK Paleogene granites: textural, compositional, and paragenetic relationships
Source: Copernicus journal article supplement (doi:10.5194/ejm-33-537-2021), 2021-09-23
Supplement: Supplementary file [file ejm-33-537-2021-supplement-title-page.pdf › ejm-33-537-2021-supplement-title-page.pdf]

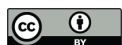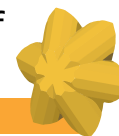

*Supplement of*

**Zirconium-bearing accessory minerals in UK Paleogene granites:  
textural, compositional, and paragenetic relationships**

**Harvey E. Belkin and Ray Macdonald**

*Correspondence to:* Harvey E. Belkin ([harveybelkin@gmail.com](mailto:harveybelkin@gmail.com))

- [ejm-33-537-2021-supplement-title-page.pdf](#)
- [Supplementary Table 1.xlsx](#)
- [Supplementary Table 2.xlsx](#)
- [Supplementary Table 3.xlsx](#)
- [\\_\\_MACOSX](#)
  - [.\\_Supplementary Table 1.xlsx](#)
  - [.\\_Supplementary Table 2.xlsx](#)
  - [.\\_Supplementary Table 3.xlsx](#)

The copyright of individual parts of the supplement might differ from the article licence.
